1 **Title: Cyto-architecture constrains a photoactivation induced tubulin gradient in**  
2 **the syncytial *Drosophila* embryo**

3  
4

5 Sameer Thukral<sup>1</sup>, Bivash Kaity<sup>2\*</sup>, Bipasha Dey<sup>1\*</sup>, Swati Sharma<sup>1</sup>, Amitabha Nandi<sup>2</sup>,  
6 Mithun K. Mitra<sup>2</sup> and Richa Rikhy<sup>1#</sup>

7  
8

\* equal contribution

9

10 **Affiliation and contact information**

11 1, Biology, Indian Institute of Science Education and Research, Homi Bhabha Road,  
12 Pashan, Pune, 411008, India Phone: +91-20-25908065

13 2, Department of Physics, Indian Institute of Technology, Mumbai, 400076, India

14

15 #To whom correspondence is addressed: [richa@iiserpune.ac.in](mailto:richa@iiserpune.ac.in)

16

17 **Key words:** syncytium, photoactivation, *Drosophila*, embryogenesis, morphogen  
18 gradient, Bicoid

19

20 **Running Title:** Gradient shape in syncytial *Drosophila* embryo

21

22 **Abbreviations:** Photoactivation (PA), Rho-GTP exchange factor 2 (RhoGEF2)

23

24 **Abstract**

25 *Drosophila* embryogenesis begins with nuclear division in a common cytoplasm forming  
26 a syncytial cell. Morphogen gradient molecules spread across nucleo-cytoplasmic  
27 domains to pattern the body axis of the syncytial embryo. The diffusion of molecules  
28 across the syncytial nucleo-cytoplasmic domains is potentially constrained by  
29 association with the components of cellular architecture, however the extent of  
30 restriction has not been examined so far. Here we use photoactivation (PA) to generate  
31 a source of cytoplasmic or cytoskeletal molecules in order to monitor the kinetics of their

32 spread in the syncytial *Drosophila* embryo. Photoactivated PA-GFP and PA-GFP-  
33 Tubulin within a fixed anterior area diffused along the antero-posterior axis. These  
34 molecules were enriched in cortical cytoplasm above the yolk-filled center suggesting  
35 that the cortical cytoplasm is phase separated from the yolk-filled center. The length  
36 scales of diffusion were extracted using exponential fits under steady state  
37 assumptions. PA-GFP spread to greater distance as compared to PA-GFP-Tubulin.  
38 Both gradients were steeper and more restricted when generated in the center of the  
39 embryo probably due to a higher density of nucleo-cytoplasmic domains. The length  
40 scale of diffusion for PA-GFP-Tubulin gradient increased in mutant embryos containing  
41 short plasma membrane furrows and disrupted tubulin cytoskeleton. The PA-GFP  
42 gradient shape was unaffected by cyto-architecture perturbation. Taken together, these  
43 data show that PA-GFP-Tubulin gradient is largely restricted by its incorporation in the  
44 microtubule network and intact plasma membrane furrows. This photoactivation based  
45 analysis of protein spread across allows for interpretation of the dependence of gradient  
46 formation on the syncytial cyto-architecture.

47

## 48 **Introduction**

49 Insect embryos initiate their development in a large syncytial cell where multiple nuclei  
50 undergo nuclear divisions in a common cytoplasm without forming complete cells. The  
51 cytoplasm is thought to mix uniformly in the syncytial cells. However, syncytial  
52 *Drosophila* embryos have distinct domains of gene expression patterns in nuclei despite  
53 being in this common cytoplasm (Shvartsman *et al.*, 2008). Several tissues in different  
54 organisms, for example, plant endosperm cells, animal muscle cells and fungal hyphae,  
55 also contain syncytial cells. Syncytial nuclei in fungi maintain distinct cell cycle stages  
56 (Anderson *et al.*, 2013; Dundon *et al.*, 2016). The spatially separated daughter nuclei in  
57 these fungi continue to proceed through the cell cycle synchronously by maintaining a  
58 similar concentration of cell cycle components (Lee *et al.*, 2013). Syncytial nuclei in  
59 muscle cells have a differential expression of mRNAs as compared to their neighbors  
60 (Pavlath *et al.*, 1989). These studies indicate that several components of the cytoplasm  
61 have local function and are likely to be generated and sequestered in the vicinity of the

62 syncytial nuclei. It is of interest to understand the cellular mechanisms that regulate  
63 compartmentalized distribution of molecules despite being in a common cytoplasm.

64  
65 The syncytial embryos of *Drosophila* provide a tractable system to decipher the extent  
66 to which different cellular components are shared across nucleo-cytoplasmic domains.  
67 *Drosophila* embryogenesis begins with 9 nuclear division cycles deep within the embryo  
68 during the preblastoderm stage. Nuclei along with centrosomes migrate to the cortex in  
69 nuclear cycle 10 and the nuclear division cycles 11-14 occur beneath the cortex in the  
70 syncytial blastoderm embryo (Foe and Alberts, 1983; Karr, 1986; Warn, 1986; Foe, Odell  
71 and Edgar, 1993; Sullivan and Theurkauf, 1995). Each interphase nucleus of the  
72 syncytial blastoderm embryo is surrounded by apical centrosomes and a microtubule  
73 array in an inverted basket conformation. Astral microtubules reach out from the  
74 centrosomes towards the cortex and overlap with the astral microtubules originating  
75 from neighbouring nuclei (Cao *et al.*, 2010). F-actin is present in caps above the nuclei  
76 and centrosomes. Lipid droplets and yolk are enriched at the bottom of the basket  
77 (Kuhn *et al.*, 2015; Mavrakis *et al.*, 2009a; Schmidt and Grosshans, 2018; Welte, 2015).  
78 Each nucleo-cytoplasmic domain in the blastoderm embryo is associated with  
79 organelles such as the endoplasmic reticulum, Golgi complex and mitochondria  
80 (Frescas *et al.*, 2006; Mavrakis *et al.*, 2009b, Chowdhary *et al.*, 2017). The microtubule  
81 and the actin cytoskeleton remodel during prophase and metaphase of the syncytial  
82 division cycle. The centrosomes move laterally during prophase and give rise to  
83 spindles during metaphase. Actin is enriched along the cortex at the extending plasma  
84 membrane furrows (Foe, Odell and Edgar, 1993). The short furrows present in  
85 interphase between adjacent nuclei extend deeper between spindles in metaphase.  
86 Molecules in the plasma membrane, ER, Golgi complex and mitochondria have limited  
87 exchange between adjacent nucleo-cytoplasmic domains in the syncytial *Drosophila*  
88 embryo (Frescas *et al.*, 2006; Mavrakis *et al.*, 2009b, Chowdhary *et al.*, 2017).

89  
90 Analysis of exchange of molecules in the cytoplasm or cytoskeleton across the syncytial  
91 nucleo-cytoplasmic domains remains to be documented in a systematic manner, though  
92 several studies have probed various cytoplasmic properties. Fluorescent dextran of

93 various sizes when injected in the cytoplasm of the syncytial blastoderm embryo has  
94 been used to estimate the rate of cytoplasmic diffusion in the embryo (Gregor *et al.*,  
95 2005). Micro-rheology based measurements of cytoplasmic viscosity have found that  
96 cytoplasmic viscosity is three times higher than that of water in the region between nuclei  
97 and yolk of the syncytial *Drosophila* embryo. In addition, microtubules, but not actin  
98 contribute to the observed viscosity (Wessel *et al.*, 2015).

99  
100 Morphogen gradient formation in the syncytial *Drosophila* can be used as a paradigm to  
101 estimate properties of the embryo cytoplasm. Bicoid forms a gradient in the antero-  
102 posterior axis, patterning the head of the embryo (Gregor *et al.*, 2007). The Bicoid  
103 gradient is present primarily in the cortical region of the embryo (Cai *et al.*, 2017). The  
104 dorso-ventral gradient formed by Dorsal is compartmentalized to each nucleo-  
105 cytoplasmic domain (DeLotto *et al.*, 2007) and modelling studies show that plasma  
106 membrane furrows could restrict Dorsal gradient spread (Daniels *et al.*, 2012). The  
107 Dorsal gradient formation on the ventral side depends on specific binding partners on  
108 the ventral side (Carrell *et al.*, 2017). These studies together imply that the syncytial  
109 blastoderm cortex shows gradients whose properties depend upon sequestration due to  
110 interaction with other cytoplasmic components or the syncytial cyto-architecture.

111  
112 In this study, we attempt to elucidate the extent of gradient spread across nucleo-  
113 cytoplasmic domains of the syncytial *Drosophila* embryo using a comparison between  
114 cytoplasmic PA-GFP and PA-GFP-Tubulin. Fluorescently labelled tubulin incorporates  
115 well in the microtubule network and is also present in the cytoplasm. We use  
116 photoactivation to generate a fixed population of PA-GFP or PA-GFP-Tubulin and find  
117 that both diffuse in the cortical region as compared to the yolk filled central region of the  
118 syncytial blastoderm embryo. The gradient of PA-GFP-Tubulin is more restricted as  
119 compared to PA-GFP in the antero-posterior axis. PA-GFP and PA-GFP-Tubulin have a  
120 decreased spread when generated in the middle of the embryo as compared to the  
121 anterior. The PA-GFP-Tubulin gradient diffuses to a greater distance in mutants  
122 showing a loss of plasma membrane furrows and disruption of the microtubule network.  
123 The PA-GFP gradient is not affected in these mutants. Our study provides a framework

124 for assessing the regulation of gradient formation by its interaction with the syncytial  
125 cytoarchitecture components and has implications on the spread of morphogen  
126 gradients across different paradigms.

127

## 128 **Results**

129

### 130 **Cytoplasmic GFP and mCherry-Tubulin are enriched cortically in the syncytial** 131 **division cycles in the *Drosophila* embryo**

132 The syncytial *Drosophila* blastoderm embryo has a characteristic arrangement of  
133 microtubules around each nucleus. Microtubules emanate from the apical centrioles and  
134 spread vertically covering the nuclei in an inverted basket like arrangement (Karr, 1986;  
135 Sullivan and Theurkauf, 1995). In order to test the extent of spread of molecules in the  
136 cytoplasm we imaged embryos expressing GFP ubiquitously under the control of the  
137 *ubiquitin* promoter. GFP is expected to be present primarily in the cytoplasm and is not  
138 known to interact with any cytoplasmic components (Verkman, 1999). We compared the  
139 expression of cytoplasmic GFP to fluorescently labelled tubulin as it would partition into  
140 the cytoplasm and also incorporate into the microtubule cytoskeleton. For this we  
141 imaged live embryos expressing fluorescently tagged alpha-Tubulin (UASp-mCherry-  
142 Tubulin) (Rusan and Peifer, 2007) with *mat-Gal4-vp16* (*mat-Gal4*). We found that  
143 cytoplasmic GFP was enriched cortically and accumulated inside the cortical nuclei  
144 (Figure 1A). Accumulation of GFP occurs passively inside the nucleus as a result of its  
145 small size which allows it to pass through the nuclear pore complex (Ruiwen Wang,  
146 2007). The fluorescence intensity of cytoplasmic GFP progressively increased near the  
147 cortex as syncytial division cycles progressed but remained above the yolk filled region  
148 (Figure 1B, Movie S1). We noticed GFP fluorescence dropped to approximately 30%  
149 between 32 to 36 $\mu$ m in syncytial cycle 14 (Figure 1E). mCherry-Tubulin was enriched  
150 on apical centrioles, in microtubules spreading vertically from the cortex and in the  
151 cytoplasm in the syncytial division cycles (Figure 1C, Movie S2). mCherry-Tubulin also  
152 showed progressive accumulation of fluorescence signal near the cortex as the  
153 syncytial cycles progressed (Figure 1D). mCherry-Tubulin fluorescence dropped to 30%  
154 between 25 to 27 $\mu$ m beneath the cortex in syncytial cycle 14 (Figure 1F). Thus

155 cytoplasmic GFP and mCherry-Tubulin were concentrated near the cortex and further  
156 enriched during the progression of the nuclear cycles. In addition, they were present in  
157 a separate cortical layer of cytoplasm on top of and distinct from the inner yolk-filled  
158 region of the embryo.

159

160 **Photoactivation generates a source of PA-GFP and PA-GFP-Tubulin at the**  
161 **anterior that forms a cortical gradient along the antero-posterior axis**

162 Labelled tubulin had a cytoplasmic and a microtubule bound fraction, in contrast to  
163 GFP, which had a cytoplasmic fraction in the *Drosophila* syncytial blastoderm embryo.  
164 This gave us an opportunity to assess the diffusion of these two proteins in the  
165 cytoplasm across nucleo-cytoplasmic domains. Computational simulations have  
166 predicted that binding to microtubule network and movement on motors is sufficient for  
167 partitioning the cytoplasm, in the absence of membrane boundaries in the syncytial  
168 blastoderm embryo (Chen *et al.*, 2012). We therefore asked whether tubulin which  
169 partitions partially into microtubules could be more restricted as compared to GFP in the  
170 syncytial blastoderm embryo.

171

172 Photoactivation of cytoplasmic and cytoskeletal proteins has been used to generate a  
173 local source of protein molecules for monitoring their directional spread in axons  
174 (Gauthier-Kemper *et al.*, 2012; GuraSadovsky *et al.*, 2017). In order to differentially test  
175 the spread of cytoplasmic and cytoskeletal proteins in the syncytial blastoderm embryo,  
176 we used photoactivation to create a local source of fluorescent PA-GFP or PA-GFP-  
177 Tubulin at different locations of the embryo (Figure 2A). Unlike morphogens such as  
178 Dorsal and Bicoid, GFP and tubulin are not differentially distributed in the syncytial  
179 embryo. PA-GFP and PA-GFP-alpha-Tubulin84B (PA-GFP-Tubulin) were expressed  
180 individually in embryos by crossing the transgenic flies to *mat-Gal4*. A fixed area was  
181 continuously photoactivated to form fluorescent PA-GFP/PA-GFP-Tubulin, thus creating  
182 a local source of PA-GFP/PA-GFP-Tubulin at the anterior pole of the embryo (Figure  
183 2B,D, Movie S3,4). The movies of PA-GFP photoactivation also showed the presence of  
184 a strong autofluorescent signal at the base of the cortex comprising of yolk (Movie S3).  
185 The movies of PA-GFP-Tubulin showed an increase in fluorescence in the cytoplasm

186 and PA-GFP-Tubulin was also incorporated in microtubules in interphase and in  
187 metaphase spindles (Movie S4). Both PA-GFP and PA-GFP-Tubulin increased in  
188 concentration by diffusion away from the source across the syncytial division cycles. A  
189 kymograph obtained at the source of photoactivation showed a distinct increase in  
190 amount of photoactivated molecules over time (Figure 2C,E). The kymograph also  
191 showed that the fluorescent signal was enriched near the cortex and did not enter the  
192 central yolk filled region of the embryo. An analysis of the directionality of spread  
193 showed that both molecules spread to a greater distance cortically along the antero-  
194 posterior axis (XY) as compared to the depth within the embryo (XZ) (Figure 2F,G). The  
195 cytoplasm of syncytial *Drosophila* blastoderm embryo has a biphasic distribution with  
196 cortical nucleo-cytoplasmic domains present above a barrier comprising of yolk and  
197 other unknown components (Foe and Alberts, 1983; Wessel *et al.*, 2015). This  
198 organization possibly allows for greater spread along the cortex in the antero-posterior  
199 axis as compared to the centre.

200

### 201 **Anteriorly photoactivated PA-GFP and PA-GFP-Tubulin shows an exponential** 202 **gradient that is steeper for PA-GFP-Tubulin**

203 We next attempted to quantify the gradients obtained in the antero-posterior axis on  
204 photoactivation of PA-GFP and PA-GFP-Tubulin anteriorly. We found that the  
205 photoactivated probes spread further as the syncytial cycles progress (Figure 3A,B).  
206 The fluorescence intensity of PA-GFP and PA-GFP-Tubulin increased with time at  
207 different locations in the embryo (Figure 3C,D). The concentration of PA-GFP and PA-  
208 GFP-Tubulin when measured at  $11\mu\text{m}$  from the photoactivation source, increased with  
209 time and reached saturation. The time taken to reach steady state increased as we  
210 moved away from the photoactivation source. Temporal evolution of fluorescence at  
211  $x=38\mu\text{m}$  approached a steady state at later time points. In contrast, for  $x=165\mu\text{m}$ , the  
212 concentration did not reach a steady value (Figure 3C,D). This is also apparent from the  
213 temporal evolution of the rate of change of the concentration at these different locations  
214 (Figure 3E,F). We used the steady state concentration profile and extracted the  
215 characteristic length scales by fitting it to an exponential decay equation (Figure 3G,H).  
216 PA-GFP and PA-GFP-Tubulin formed gradients of distinct length scales after activation

217 at the anterior pole (Figure 3I). We found that the length scale for PA-GFP ( $186\pm 25\mu\text{m}$ )  
218 was significantly higher than PA-GFP-Tubulin ( $70\pm 4\mu\text{m}$ ) (Figure 3J). The estimated  
219 diffusion coefficient for PA-GFP was  $44.25\mu\text{m}^2/\text{s}$  and PA-GFP-Tubulin was  $20.87\mu\text{m}^2/\text{s}$   
220 (refer to Materials and Methods). This is likely to be because PA-GFP-Tubulin, in  
221 addition to being present in the cytoplasm is also engaged in forming the microtubule  
222 cytoskeleton and this turnover makes it less available to diffuse as compared to PA-  
223 GFP alone.

224

225 **Photoactivation of the cytoplasmic PA-GFP and PA-GFP-Tubulin in the middle of**  
226 **the *Drosophila* embryo results in a gradient with a smaller length scale as**  
227 **compared to the anterior activation**

228 The syncytial *Drosophila* embryo has three domains containing distinct patterns of  
229 density of nuclei and packing (Blankenship and Wieschaus, 2001; Rupprecht *et al.*,  
230 2017). The domains show different speeds of furrow extension during cellularization.  
231 The anterior and posterior domain contain nuclei at a lower density as compared to the  
232 middle domain and the cells formed have a shorter plasma membrane furrows as  
233 compared to the middle domain in cellularization. This difference in architecture across  
234 the antero-posterior axis is regulated by the patterning molecules Bicoid, Nanos and  
235 Torso (Blankenship and Wieschaus, 2001). This difference in the density of nucleo-  
236 cytoplasmic domains prompted a comparison of the extent of gradient spread, when it  
237 originates in the middle of the embryo versus when it originates in the anterior domain  
238 (Figure 2A).

239

240 We tested if there was a difference in kinetics of gradient formation when  
241 photoactivation was carried out in the middle (Figure 4) of the embryo as compared to  
242 the anterior (Figure 2,3). For this we photoactivated PA-GFP and PA-GFP-Tubulin  
243 containing embryos in a fixed region in the middle of the embryo (Figure 2A, 4A,C).  
244 Photoactivation produced a cortical gradient with a progressive increase in gradient  
245 spread across the syncytial division cycles (Figure 4B,D-F, Movie S5,6). The gradient of  
246 PA-GFP and PA-GFP-Tubulin spread to a greater extent in the antero-posterior axis



247 (XY) as compared to the depth of the embryo (XZ), away from the region of  
248 photoactivation (Figure 4G,H).

249  
250 Length scale values were extracted by fitting an exponential equation and it was found  
251 that the extent of spread for both the probes was lower (PA-GFP  $57.4 \pm 7 \mu\text{m}$ , PA-GFP-  
252 Tubulin  $45.6 \pm 10 \mu\text{m}$ ) than that observed when photoactivation was performed anteriorly  
253 (Figure 4I-K). We further analysed if there was any difference in the gradient formation  
254 from the centre towards the anterior versus centre towards the posterior pole (Figure  
255 4L,M). We found the length scales of the gradients did not differ in either direction  
256 (Figure 4N). These analyses show that the gradient spreads uniformly across the  
257 syncytial nucleo-cytoplasmic domains towards the anterior pole and the posterior pole  
258 of the *Drosophila* embryo, negating the presence of any cytoplasmic flows or currents.  
259 In summary, photoactivated molecules generated in middle spread to a smaller distance  
260 as compared to when they were generated at the anterior pole.

261  
262 **Anteriorly photoactivated PA-GFP-Tubulin gradient length scale increases in**  
263 **embryos containing an overexpression of RhoGEF2 on loss of pseudocleavage**  
264 **furrows**

265 The gradients produced by PA-GFP and PA-GFP-Tubulin provided a framework to test  
266 the role of syncytial cytoarchitecture in regulating their diffusion. Each cortical nucleus in  
267 the syncytial blastoderm embryo of *Drosophila* contains a small ingression of the  
268 plasma membrane around it. Astral microtubules support ectopic furrows (Barmchi *et*  
269 *al.*, 2005; Cao *et al.*, 2008; Crest *et al.*, 2012). The plasma membrane furrows ingress  
270 deeper in metaphase to form pseudocleavage furrows (Schmidt and Grosshans, 2018).  
271 To test the role of furrows in regulation of gradient formation across the syncytial  
272 nucleo-cytoplasmic domains, we performed photoactivation experiments in embryos  
273 defective in furrow formation. RhoGEF2 is a Rho-GTP exchange factor specifically  
274 needed for the formation of furrows in the syncytial embryo (Barmchi *et al.*, 2005; Cao  
275 *et al.*, 2008; Crest *et al.*, 2012). Depletion of RhoGEF2 leads to shortened furrows and  
276 increase in RhoGEF2 is likely to increase active Myosin II and abolish furrow formation  
277 (Sherlekar and Rikhy, 2016; Zhang *et al.*, 2018). We overexpressed RhoGEF2 by

278 crossing flies containing *mat-Gal4* and UASp-RhoGEF2. Embryos overexpressing  
279 RhoGEF2 showed short or missing furrows in metaphase (Figure 5A). The metaphase  
280 spindles did not show a significant change in these embryos as compared to controls  
281 (Figure 5A).

282

283 Next, we generated embryos expressing PA-GFP or PA-GFP-Tubulin along with  
284 RhoGEF2 overexpression. We performed continuous photoactivation at the anterior  
285 pole in a fixed area and followed the resultant gradient across time (Figure 5B,D, Movie  
286 S7,8). We found that similar to the control embryos (Figure 2), the gradients evolved  
287 over time (Figure 5B-G). Further, in spite of major contractions in the embryo yolk  
288 (Movie S7,8), the activated fluorescent molecules remained near the cortex and did not  
289 mix with the underlying inner yolk region of the embryo (Figure 5H,I). This was also  
290 evident from the kymographs which showed undulations in the cortical layer of  
291 fluorescence, yet maintaining a separation from the embryo's inner yolk region (Figure  
292 5C,E). The PA-GFP gradients did not change in the embryos over-expressing  
293 RhoGEF2 (Figure 5J). The PA-GFP-Tubulin gradient however changed significantly  
294 (Figure 5K) when compared to their respective gradients in control embryos (Figure 2).  
295 The length scales were extracted on fitting an exponential function to the concentration  
296 profile obtained. It was found that PA-GFP-Tubulin ( $161 \pm 30 \mu\text{m}$ ) gradient spread to a  
297 greater extent in embryos overexpressing RhoGEF2 as compared to control embryos.  
298 There was no significant difference in PA-GFP-Tubulin spread from PA-GFP  
299 ( $191 \pm 36 \mu\text{m}$ ) in RhoGEF2-OE embryos (Figure 5L). RhoGEF2 overexpression led to  
300 loss of plasma membrane furrows and loss of restriction of PA-GFP-Tubulin gradient in  
301 the syncytial *Drosophila* embryo.

302

### 303 **Anteriorly photoactivated PA-GFP-Tubulin gradient length scale increases in** 304 **mutants of EB1**

305 Microtubules emanate from the centrosome at the apical side and spread vertically  
306 downwards in the syncytial blastoderm embryo (Kellogg *et al.*, 1988; Sullivan and  
307 Theurkauf, 1995). EB1 is present at the growing end of microtubules and its depletion is  
308 likely to disrupt the microtubule architecture (Rogers *et al.*, 2002). We depleted embryos

309 of EB1 by combining *eb1* RNAi to *mat-Gal4* to disrupt microtubule organization. The  
310 microtubule staining was reduced in embryos expressing *eb1* RNAi expressing  
311 embryos. Also the plasma membrane levels for Scribbled were lowered (Figure 6A).  
312  
313 We combined the *eb1* RNAi with flies expressing PA-GFP or PA-GFP-Tubulin and  
314 performed anterior photoactivation experiments in a fixed area (Figure 6B,D, Movie  
315 S9,10). We found that similar to the control embryos (Figure 2), the gradient evolved  
316 over time (Figure 6B-G). Similar to RhoGEF2 overexpression embryos, in spite of major  
317 contractions in the embryo yolk, the activated fluorescent molecules remained near the  
318 cortex (Figure 6C,E) and did not mix with the underlying yolk region of the embryo  
319 (Figure 6H,I). Length scales were extracted by fitting these gradients (Figure 6J,K) to an  
320 exponential function. We saw that the PA-GFP gradient did not change, while PA-GFP-  
321 Tubulin gradient in mutant embryos changed significantly. The length scale analysis  
322 showed that PA-GFP-Tubulin ( $96 \pm 9 \mu\text{m}$ ) in *eb1* RNAi spread more than control  
323 embryos. There was no significant difference between the PA-GFP-Tubulin length scale  
324 as compared to PA-GFP ( $111 \pm 15 \mu\text{m}$ ) in *eb1* RNAi embryos, even though the PA-GFP  
325 was more constrained than control embryos (Figure 6L). In summary, *eb1* mutant  
326 embryos showed a disrupted microtubule architecture and showed a loss of restriction  
327 of PA-GFP-Tubulin gradient in the syncytial *Drosophila* embryo.

328

## 329 **Discussion**

330 In this study, we have examined the distribution and diffusion of cytoplasmic  
331 components of the *Drosophila* syncytial blastoderm embryo. We have used  
332 photoactivation of cytoplasmic PA-GFP to analyze its distribution and diffusion across  
333 nucleo-cytoplasmic domains of the syncytial *Drosophila* embryo and further compared it  
334 to PA-GFP-Tubulin, which is present in the cytoplasm and is also incorporated in  
335 microtubules. We find that the cytoplasmic components have an increased  
336 concentration at the cortex near the nucleo-cytoplasmic domains. Photoactivation of  
337 these components shows diffusion to a greater distance in the antero-posterior axis in  
338 the cortex as compared to the depth of the embryo. Also photoactivated cytoplasmic  
339 components diffuse less when generated at the center of the embryo as compared to

340 the anterior. Diffusion is constrained by interaction with the cyto-architecture  
341 components of the syncytial blastoderm embryo (Figure 7).

342

### 343 ***Photoactivation as a method to study regional differences in kinetics of gradient*** 344 ***formation in the syncytial Drosophila embryo***

345 The use of photoactivatable GFP molecules allows for the creation of localized ectopic  
346 gradients and enables us to follow their evolution in real time across the syncytial  
347 nuclear cycles. Photoactivation has been used previously to analyze the spread of  
348 morphogen gradients in similar contexts. Photoactivation of Dorsal-PA-GFP allowed an  
349 analysis of the extent of its spread in the dorsal versus the ventral side of the syncytial  
350 blastoderm embryo. Sequestration of Dorsal by signaling components and nuclear  
351 capture on the ventral side gave a more constrained gradient as compared to the dorsal  
352 side of the embryo (Carrell *et al.*, 2017). In our study we used two photoactivatable  
353 proteins which are incorporated in all nucleo-cytoplasmic domains. This allows us to  
354 quantify the differences in their diffusion due to inherent differences in their association  
355 with cyto-architecture of the embryo. We found that PA-GFP and PA-GFP-Tubulin had  
356 smaller length scales when activated at the center as compared to the anterior of the  
357 syncytial blastoderm embryo. The restricted diffusion at the center of the embryo could  
358 be a result of a difference in relative crowding of nucleo-cytoplasmic domains in these  
359 two regions (Blankenship and Wieschaus, 2001; Rupprecht *et al.*, 2017). An increase in  
360 the density of nucleocytoplasmic domains in the center could lead to greater  
361 sequestration of cytoplasmic components in general, leading to a smaller length scale.  
362 Alternatively this could also come about due to differences in protein degradation or  
363 sequestration machinery between these two regions. Whether the difference in density  
364 of nucleo-cytoplasmic domains also leads to change in viscosity in the two regions  
365 remains to be examined.

366

### 367 ***Cytoplasm organization in cells***

368 The cytoplasm of majority of living cells can be described as an inhomogeneous, multi-  
369 phasic medium. Images of different components when drawn to scale (Goodsell, 2013)  
370 clearly convey the fact that the cytoplasm is quite contrary to the earlier picture of a

371 freely flowing medium. The cytoplasm can be likened to a complex medium comprising  
372 of physical constraints and constraints due to binding and crowding. Fluorescent  
373 dextran of various sizes when injected into cells partitions based on their size (Luby-  
374 Phelps, 2000). This further corroborates the fact that the space available for various  
375 cytoplasmic components is constrained depending on their size. The metabolic state  
376 can also change properties of the cytoplasm in the bacterial cell into either a glass-like  
377 or fluid-like state (Parry *et al.*, 2014). Cytoplasmic distribution can change depending on  
378 the ability and strength of a cytoplasmic molecule to bind to other components. A  
379 modelling based study showed that binding to negative end directed dynein motors on  
380 the mitotic spindle was sufficient to partition the cytoplasm into two halves even without  
381 the presence of any membrane bound compartments (Chen *et al.*, 2012).

382  
383 Our finding that PA-GFP-Tubulin is more restricted in its spread as compared to PA-  
384 GFP suggests that cytoplasmic components having multiple interactors are more  
385 confined in their diffusion. For the syncytium, this property is beneficial, as components  
386 produced from a syncytial nucleus tend to remain near their parent nucleus, with no  
387 clear boundaries being present in the shared cytoplasm. This observation suggests that  
388 different components in a cell could be restricted by distinct mechanisms, some binding  
389 to microtubules, some to actin or some being sequestered in the nuclei or other  
390 organelles ultimately resulting in restricting their action in space and time. The diffusion  
391 of PA-GFP-Tubulin in our study increased on abrogation of the metaphase furrows and  
392 microtubule cytoskeleton in embryos over-expressing RhoGEF2 and *eb1* RNAi, it  
393 reached length scales similar to PA-GFP. This further suggested that binding and  
394 sequestration were responsible for PA-GFP-Tubulin restriction. Loss of plasma  
395 membrane furrows could also lead to disorganization of astral microtubules (Cao *et al.*,  
396 2010; Crest *et al.*, 2012) in the periphery thereby increasing the effective diffusion of  
397 PA-GFP-Tubulin.

398  
399 Further, the observation that cytoplasmic components are cortically enriched  
400 corroborates previously reported data about Bicoid movement in the cortex and its  
401 dependence on the actin and the microtubule cytoskeleton of syncytial blastoderm

402 embryos (Cai *et al.*, 2017). SEM images from cross sectioned *Drosophila* embryos also  
403 show the presence of similar biphasic compartments (Figard *et al.*, 2013; Turner and  
404 Mahowald, 1976). Filamentous actin and non-muscle myosin are concentrated in the 3-  
405 4 $\mu$ m and 1-2 $\mu$ m region of the “yolk-free” cytoplasm just beneath the plasma membrane  
406 of the embryo, respectively (Foe, Odell and Edgar, 1993). The cortical yolk-free  
407 cytoplasm increases in its depth as the syncytial cycles progress (Foe, Odell and Edgar,  
408 1993). Our study is a further characterization of protein mobility in these phases, and we  
409 show that the cortical cytoplasm and yolk beneath it seem to form two separate phases,  
410 and do not mix in spite of major contractions of the embryo in mutant embryos. The size  
411 of the cortical cytoplasmic region as determined by the spread of cytoplasmic GFP in  
412 our study, is approximately 40 $\mu$ m, where the fluorescence intensity falls off sharply. This  
413 observation raises further questions about how these two phases are separate and the  
414 mechanisms that contribute to maintaining their integrity.

415

#### 416 ***Implications on morphogen diffusion***

417 The observation about the presence of two separate phases of cortical cytoplasm and  
418 embryo yolk provides an interesting perspective to our current understanding of the  
419 morphogen gradients in the early embryo, namely, Bicoid, Dorsal and Torso. The Bicoid  
420 gradient has been extensively studied using the framework of the synthesis, diffusion  
421 and degradation (SDD) (Durrieu *et al.*, 2018; Gregor *et al.*, 2007; Grimm *et al.*, 2010)  
422 and related models. However, a complete theoretical understanding of the mechanisms  
423 underlying the formation of the Bicoid gradient is still lacking. Our finding implicates a  
424 restriction of the effective volume in which Bicoid gradient develops and matures. It also  
425 raises the possibility that various cytoarchitectural components could impinge on its  
426 formation. For example, perturbations in furrows or cytoskeletal structures can change  
427 the effective concentration of morphogens in the cortical cytoplasm, leading to changes  
428 in the morphogen profiles, specifically for Bicoid.

429

430 There have also been various studies, implicating the size and shape of the mRNA  
431 source in Bicoid gradient formation (Fahmy *et al.*, 2014; Little *et al.*, 2011; Spirov *et al.*,  
432 2009). Photoactivation allows creation of different sized sources which can produce PA-

433 GFP/PA-GFP-Tubulin or morphogen gradients at different rates and provides an  
434 opportunity to study the effect of the source on the gradient shape and dynamics.

435  
436 The observation of distinct gradient length scales of PA-GFP-Tubulin versus PA-GFP  
437 points to another facet of morphogen gradient formation, namely decrease in the  
438 diffusivity of morphogens based on their interactions. FGF gradient is known to interact  
439 with Heparan sulfate proteoglycans which changes the effective diffusivity of the  
440 morphogen. The removal of these proteoglycans leads to an increase in the morphogen  
441 spread (Balasubramanian and Zhang, 2016). We can interpret the difference between  
442 the PA-GFP and PA-GFP-Tubulin profiles as being a consequence of increased binding  
443 of tubulin to the microtubule architecture. This leads to increase in its residence time by  
444 sequestration and thus a lower effective diffusion and consequently, a smaller length  
445 scale. It would be interesting to analyse the effect of removal of binding interactions for  
446 well-studied morphogen like Bicoid. It is notable that Dorsal gradient is known to be  
447 modulated depending on the presence or absence of a dimerizing GFP (Carrell *et al.*,  
448 2017).

449  
450 Finally, our observation of difference in length scales between anterior versus centre  
451 photoactivation suggests a difference in cyto-architectural properties for different  
452 regions of the embryo. Our studies necessitate a systematic analysis of the impact of  
453 local architectural properties in the formation and maintenance of morphogen gradients.

454

## 455 **Materials and methods**

456

### 457 ***Drosophila* stocks and crosses**

458 *Drosophila* stocks were maintained in standard corn meal agar at 25°C. All crosses  
459 were set up at 25°C, except *eb1* RNAi (29°C). *mat-gal4-vp16*; *mat-gal4-vp16* (Girish  
460 Ratnaparkhi, IISER, Pune, India) was used to drive mCherry-alpha-TubulinA1B  
461 (mCherry-Tubulin) (#25774), PA-GFP (gift from Prof. Gerald M. Rubin, Janelia  
462 Research Campus, VA, USA), PA-GFP-alpha-Tubulin84B (PA-GFP-Tubulin) (#32076),

463 UASp-RhoGEF2 (#9386) and *eb1* RNAi (#36599). GFP expressed under ubiquitin  
464 promoter (*ubi*-GFP, #1681) was imaged directly.

465

## 466 **Microscopy**

467 1.5 hour old embryos were collected on sucrose agar plates, washed, dechorionated  
468 using 100% bleach, mounted on coverglass chambers (LabTek, Germany) in PBS  
469 (Mavrakis *et al.* 2008) and imaged on Plan-Apochromat 25x/0.8 Oil Immersion or Plan-  
470 Neofluar 40x/1.30 Oil objective on Zeiss LSM780 or LSM710 systems. PA-GFP and PA-  
471 GFP-Tubulin were photoactivated using the 405 nm diode laser using the bleach  
472 module on the LSM software. PA-GFP and PA-GFP-Tubulin thus produced was imaged  
473 using the 488 nm laser. ROI size was kept constant at  $373\mu\text{m}^2$ . Photoactivation  
474 iterations were kept constant at 10 iterations per frame with activation being performed  
475 after every frame. The photoactivation was carried out for 0.36s (10 iterations). 512  
476 pixel X 512 pixel images were acquired after that with a scan speed of 1.97 seconds per  
477 frame. Mid sagittal sections were imaged. 8 bit images were acquired with mean line  
478 averaging of 2. The gain and laser power were adjusted to be cover the dynamic range  
479 of each fluorescent tag and care was taken to not reach 255 on the 8 bit scale. Pinhole  
480 was kept open at  $180\mu\text{m}$ .

481

## 482 **Immunostaining**

483 F1 flies were selected from Gal4 and mutant crosses were transferred to embryo  
484 collection cages (Genesee Scientific, CA, USA) with 2.5% sucrose agar supplemented  
485 with yeast paste. Embryos were washed, dechorionated using 100% bleach for 1 min,  
486 washed and fixed in heptane: 4% paraformaldehyde (1:1) in PBS (1.8 mM  
487  $\text{KH}_2\text{PO}_4$ , 137 mM NaCl, 2.7 mM KCl, 10 mM  $\text{Na}_2\text{HPO}_4$ ) for 20 mins at room  
488 temperature. Embryos were devitellinized by vigorously shaking in heptane:methanol  
489 (1:1) for anti-Tubulin and Scribbled immunostaining. 2% Bovine Serum Albumin (BSA)  
490 in PBS with 0.3% Triton X-100 (PBST) was used for blocking. Following primary  
491 antibodies were diluted in the block solution: anti-Tubulin (Anti-mouse, Sigma-Aldrich,  
492 Bangalore, India, 1:1000), anti-Scrib (Anti-Rabbit, Kind gift by Prof. Kenneth  
493 Prehoda, University of Oregon, OR, USA, 1:1000). Fluorescently coupled secondary



494 antibodies (Alexa Fluor 488, 568, 647 coupled anti-rabbit and anti-mouse, Molecular  
495 Probes, Bangalore, India) were used at 1:1000 dilution in PBST. Embryos were imaged  
496 using LD LCI Plan-Apochromat 25x/0.8 ImmKorr DIC M27 objective on the Zeiss  
497 LSM710/780.

498

### 499 **Image analysis**

500 Segmented lines of 10 or 20 pixel (10 or 20 $\mu$ m width) were drawn across the cortex  
501 from the anterior to the posterior or centre to anterior/posterior of the embryo on the  
502 dorsal and the ventral side. Line profile measurements, containing embryo length vs  
503 intensity values were obtained using ImageJ. For XZ analysis, similar segmented lines  
504 were drawn for a distance of 90 $\mu$ m from the place of activation, in XY or XZ directions.  
505 The process was multiplexed using ImageJ macros. A MATLAB script was used to  
506 process the generated files. The script rescales the embryo length from 0 to 1 in the  
507 antero-posterior direction, subtracts the minimum intensity value, rescales it with the  
508 maximum and smoothens the intensity values using sliding window averaging.

509

### 510 **Sampling and Statistics**

511 3 or more embryos as indicated in the corresponding figure legends were imaged and  
512 quantified for each experiment. Graphpad Prism 5.0 was used for Statistical analysis  
513 and plotting.

514

### 515 **Theory**

#### 516 **Estimation of length scales from concentration profiles**

517 The time evolution of the concentrations of the photo-activated molecules were  
518 analysed within the framework of the standard one-dimensional Synthesis-Diffusion-  
519 Degradation (SDD) model in a domain of length  $L$ (Crick, 1970),

$$\frac{\partial C(x,t)}{\partial t} = D \frac{\partial^2 C(x,t)}{\partial x^2} - \kappa C(x,t)$$

520 where,  $C(x,t)$  represents the concentration of the photo-activated species as position  $x$   
521 at time  $t$ ,  $D$  is the diffusion constant, and  $\kappa$  is the degradation rate. The mean lifetime of  
522 the molecule  $\tau$  is the inverse of the degradation rate,  $\tau = 1/\kappa$ . This equation is to be  
523 solved subject to the appropriate boundary conditions, accounting for the presence of a

524 localised source of fluorescent molecules at the anterior pole of the embryo (or at the  
525 centre in the case of centre activation), and reflecting boundary conditions at the  
526 posterior pole,

$$527 \quad - \left. \frac{\partial c}{\partial x} \right|_{x=0} = 0 \quad \text{and} \quad \left. c \right|_{x=L} = 0$$

528 and the appropriate initial condition reflecting the absence of any photoactivated  
529 molecules for  $x \leq 0$ ,  $(c, \frac{\partial c}{\partial x})|_{x=0} = 0$ .

530

531 At long enough times, the concentration profile evolves to a steady state (Figure 3C,D).  
532 The steady state solution of the SDD model for a semi-infinite domain is given by,

$$c(x) = \frac{c_0}{2} \left( 1 - \frac{x}{\lambda} \right)$$

533 where the characteristic length-scale  $\lambda$  is defined as,  $\lambda = \sqrt{D/k} = \sqrt{D}/k$ . The semi-  
534 infinite assumption holds if the characteristic length-scale is much smaller than the size  
535 of the domain,  $\lambda \ll L$ .

536

537 If the length scale is comparable to the system size, then the steady state solution  
538 depends on the length of the domain (size of embryo) and is given by,

$$c(x) = \frac{c_0}{2} \left[ \frac{1 + \frac{x}{L}}{1 - \frac{x}{L}} \right]$$

539

540 In order to ensure that the concentration profiles have reached a steady state, we plot  
541 the concentration versus time plots and the rate of change of concentration for both PA-  
542 GFP and PA-GFP-Tubulin. The time taken to reach the steady state depends on the  
543 position along the AP axis, and is smaller for locations closer to the anterior pole. We  
544 first show the results for PA-GFP-Tubulin (Figure 3F). As can be seen from the figures,  
545 the tubulin concentration reaches a steady state fairly quickly, justifying the assumption  
546 of the steady state for fitting the concentration profile. The time taken to reach the  
547 steady state can be determined by the time at which the derivative  $\frac{\partial c}{\partial t}$  approaches zero.

548

549 A similar analysis can be performed for PA-GFP (Figure 3E). The situation in this case  
550 is more complex, with the locations closer to the anterior pole having reached a steady  
551 state, while locations further away still evolving at the final time point of the experiments.

552 The larger time taken to reach the steady state for PA-GFP can be understood from the  
553 fact that the length-scale for PA-GFP is much larger than PA-GFP-Tubulin and hence it  
554 takes a correspondingly larger time for the concentration profile as a whole to reach  
555 steady state. In this case, since the locations closer to the anterior pole have reached a  
556 steady state, we can fit the concentration profile in a localised region closer to the  
557 anterior pole.

558

559 The concentration profiles at the last time point are fitted by this steady state formula to  
560 obtain the characteristic length-scale  $\lambda$ . The fits are shown for PA-GFP (Figure 3G) and  
561 PA-GF-Tubulin (Figure 3H). This yields,

562  $\lambda = 145 \pm 24.6$                       and                       $\lambda = 86 \pm 11.28$

563 The PA-GFP spreads to a much larger distance from the anterior pole than Tubulin-PA-  
564 GFP.

565

### 566 **Estimation of diffusion constant from concentration profiles**

567 For the SDD model, the time taken to reach the steady state can be estimated  
568 theoretically (Berezhevskii *et al.*, 2010), and is given by ,

569 
$$\tau() = \frac{1}{2}(1 + )$$

570 Where,  $\tau()$  is the time taken to reach steady state at location , and the mean lifetime of  
571 the molecule is denoted by  $\tau$ , as before. The above formula also supports the notion  
572 that locations further away from the source at the anterior pole, take longer time to  
573 reach steady state. For distances much smaller than the characteristic length-scale,  $\ll$   
574 , the above equation reduces to  $\tau() = /2$ , and hence the mean lifetime can be read off  
575 from the concentration plots (Figure 3C,D) and its derivative plots (Figure 3E,F) by  
576 noting the time taken to reach steady state for both PA-GFP and PA-GFP-Tubulin for  
577  $= 11( \ll )$ . This yields,

578  $\tau \approx 600$                       and                       $\tau \approx 200$

579 Combining the estimates of the length scale  $\lambda$  and the lifetime  $\tau$ , we can then  
580 independently obtain an estimate of the diffusion constant,

$$= \lambda^2 / \tau$$

581 This gives,

582  $\approx 44.25^2/$  and  $\approx 20.87^2/$

583  
584 The estimation of the time taken to reach steady state makes certain assumptions.  
585 Firstly, the fluctuations in the concentration can be significantly high in certain embryos,  
586 which results in a large variation of the time estimate. Secondly, a characteristic feature  
587 of the time evolution of concentration profiles is that there is a sharp initial increase  
588 followed by a slow increase in the concentration. This suggests that there may be other  
589 biological processes beyond those described by the SDD model that affect the evolution  
590 of the concentration to the steady state. While estimating the diffusion coefficient, we  
591 neglect the slower variation and have chosen the onset of this slow increase as the  
592 steady state time.

593

#### 594 **Acknowledgements**

595 Stocks obtained from the Bloomington *Drosophila* Stock Center (NIH P40OD018537) were  
596 used in this study. ST, BD, SS thank CSIR India for funding their fellowship. RR thanks  
597 DBT, DST and IISER Pune for funding the lab. BK thanks MHRD for fellowship. MM thanks  
598 DST Ramanujan Fellowship (13DST052) and IRCC, IIT Bombay for funding. AN  
599 acknowledges IRCC, IIT Bombay, India, and SERB, DST, India (Project No.  
600 ECR/2016/001967) for financial support.

601

#### 602 **Figure Legends**

#### 603 **Figure 1: Cytoplasmic GFP and mCherry-Tubulin are enriched cortically in the** 604 **syncytial division cycles**

605 A-D: Characterization of cortical spread of GFP and mCherry-Tubulin in the syncytial  
606 division cycles. Images are shown from different cycles (NC11,12,13,14) of embryos  
607 ubiquitously expressing GFP (A) or maternally expressing mCherry-Tubulin (similar  
608 trends were observed for n=3 movies) (C). Kymographs show cortical enrichment of  
609 fluorescent signal for GFP (B) and mCherry-Tubulin (D) over time. Scale bar=5 $\mu$ m,  
610 600s.

611 E-F: Quantification of cortical enrichment of fluorescent signal in cytoplasmic GFP and  
612 mCherry-Tubulin. Graph shows normalized intensity profile for GFP (E) and mCherry-  
613 Tubulin (F) obtained from a line drawn from the cortical region towards the centre of the

614 embryo. The dashed line shows a point at which the intensity drops to 30%. Note that  
615 the signal remains above the region containing the dark yolk filled vesicles.  
616 The images are shown in a 16 color intensity rainbow where Blue represents the lowest  
617 intensity and red represents the highest intensity. Scale bar= 10 $\mu$ m

618

619 **Figure 2: Anteriorly photoactivated PA-GFP and PA-GFP-Tubulin produces a**  
620 **cortical gradient**

621 A. The photoactivation method to create an ectopic source of PA-GFP and PA-GFP-  
622 Tubulin. Photoactivation was carried out in a fixed area (373 $\mu$ m<sup>2</sup>) in the anterior or the  
623 center of the syncytial embryo. A kymograph monitoring the increase in signal was  
624 drawn at the source (green bar). A cortical region was drawn to estimate the change in  
625 intensity in the antero-posterior axis (orange). The exponential function was fit to  
626 estimate the length scale of spread for the gradients.

627 B-E. Anteriorly photoactivated PA-GFP and PA-GFP-Tubulin forms a gradient. Images  
628 for NC11,12,13,14 of embryos from expressing PA-GFP (B) or PA-GFP-Tubulin (D) are  
629 shown after photoactivation at the anterior pole. Kymograph shows increase in cortical  
630 fluorescence over time in PA-GFP (C) and PA-GFP-Tubulin (E) expressing embryo.

631 Scale bar=50 $\mu$ m,60s.

632 F-G. PA-GFP and PA-GFP-Tubulin spreads preferentially at the cortex. Graph  
633 quantifying the extent of spread of photoactivated protein fluorescence in the planar or  
634 antero-posterior XY axis vs depth or XZ direction for PA-GFP (F) and PA-GFP-Tubulin  
635 (G) with a line drawn across either XY or XZ direction from the activated region. The  
636 raw data is in a lighter color and the averaged data is in a darker color, error bars  
637 represent standard error on means (n=3 embryos for PA-GFP-Tubulin and PA-GFP  
638 each).

639 The images are shown in a 16 color intensity rainbow where Blue represents the lowest  
640 intensity and red represents the highest intensity. Scale bar= 50 $\mu$ m.

641

642 **Figure 3: Anteriorly photoactivated PA-GFP and PA-GFP-Tubulin forms an**  
643 **exponential gradient with PA-GFP-Tubulin being more restricted as compared to**  
644 **PA-GFP**

645 A-B. Quantification of the photoactivated signal across nuclear cycles. Graph shows  
646 intensity for PA-GFP (A) and PA-GFP-Tubulin (B) for one embryo with a line drawn  
647 across the cortical region in the syncytial nuclear cycles. Similar profiles were observed  
648 in multiple embryos (n=3 for each).

649 C-D. PA-GFP and PA-GFP-Tubulin increases in concentration over time. The graph  
650 depicts increase in PA-GFP (C) or PA-GFP-Tubulin fluorescence intensity over time as  
651 measured at different locations (11, 38, 165 $\mu$ m from the source of photoactivation at the  
652 anterior).

653 E-F. Graph shows the rate of change in concentration of photoactivated PA-GFP (E)  
654 and PA-GFP-Tubulin (F) to assess if the steady state has reached. Each plot is a  
655 derivative of the corresponding plot in C,D.

656 G-H. Anteriorly photoactivated PA-GFP and PA-GFP-Tubulin shows an exponential  
657 gradient. Raw experimental values (red) were fit to an exponential function (blue) for  
658 each probe.

659 I. Quantification of intensity profile of photoactivated probe measured at the end of the  
660 experiment for PA-GFP and PA-GFP-Tubulin. Graph shows raw data in a lighter color  
661 and averaged data in a darker color, error bars represent standard error on means (n=3  
662 embryos each for PA-GFP and PA-GFP-Tubulin).

663 J. Scatter plot of length scales extracted after fitting an exponential decay function to the  
664 intensity profiles seen in I (n=6 regions drawn in 3 embryos for PA-GFP, 8,4 for PA-  
665 GFP-Tubulin, Two tailed Mann-Whitney non-parametric test with p value=0.0007).

666

667 **Figure 4: Photoactivation of the cytoplasmic PA-GFP and PA-GFP-Tubulin in the**  
668 **middle of the *Drosophila* embryo**

669 A-D. Monitoring gradient of center photoactivated PA-GFP and PA-GFP-Tubulin.  
670 Images from NC11,12,13,14 expressing PA-GFP (A) or PA-GFP-Tubulin (C) and  
671 photoactivated at the centre of the embryo are shown. Kymograph shows increase in  
672 cortical fluorescence with time for PA-GFP (B) and PA-GFP-Tubulin (D) embryo. Scale  
673 bar=50 $\mu$ m, 60s.

674 E-F. Quantification of evolution of photoactivated signal in syncytial nuclear cycles. The  
675 graph depicts the fluorescence intensity for PA-GFP (E) and PA-GFP-Tubulin (F) from

676 one embryo for a line drawn from the source along the antero-posterior axis. Similar  
677 profiles were observed in multiple embryos (n=3 for each).

678 G-H. Quantification of photoactivated protein in XY vs XZ direction for PA-GFP (G) and  
679 PA-GFP-Tubulin (H). Graph shows intensity profile of a line drawn in the XY or XZ  
680 direction from the activated region. The raw data is shown in a lighter color and the  
681 averaged data is shown in a darker color, error bars represent standard error on means  
682 (n=3 embryos for PA-GFP-Tubulin and PA-GFP each).

683 I-J. Graphs comparing the intensity profile obtained upon photoactivation at the anterior  
684 pole versus the centre of the embryo for PA-GFP (I) and PA-GFP-Tubulin (J) (n=3  
685 embryos for PA-GFP and PA-GFP-Tubulin each).

686 K. Scatter plot of the length scales extracted after fitting an exponential decay function  
687 to the intensity profiles seen in I,J. The values of length scales for PA-GFP and PA-  
688 GFP-Tubulin for anterior photoactivation are repeated from Figure 3J. (n=8,4 for PA-  
689 GFP center activation, 6,3 for PA-GFP activated anteriorly, 6,3 for PA-GFP-Tubulin  
690 center activation and 8,4 for PA-GFP-Tubulin anterior activation. Two tailed Mann-  
691 Whitney non-parametric test with p value=0.0007 for PA-GFP and 0.04 for PA-GFP-  
692 Tubulin).

693 L-M. Graphs comparing the intensity profiles obtained upon photoactivation at the  
694 centre of the embryo for analysis of directionality of spread. Fluorescence intensity is  
695 obtained from a line drawn from the centre activated region towards anterior or posterior  
696 pole for PA-GFP (I) and PA-GFP-Tubulin (J). The raw data is shown in a lighter color  
697 and the averaged data is shown in a darker color, error bars represent standard error on  
698 means (n=3 embryos for PA-GFP-Tubulin and PA-GFP each).

699 N. Scatter plot of the length scales extracted after fitting an exponential decay function  
700 to the intensity profiles seen in L,M. (n=4,4 for PA-GFP center activation, center to  
701 anterior subset from K, 4,4 for PA-GFP center activation, centre to posterior subset from  
702 K, 3,3 for PA-GFP-Tubulin center activation, centre to anterior subset from K and 3,3 for  
703 PA-GFP-Tubulin center activation, centre to posterior subset from K. Two tailed Mann-  
704 Whitney non-parametric test with p value=0.34 for PA-GFP and 1 for PA-GFP-Tubulin).  
705 The images are shown in a 16 color intensity rainbow where Blue represents the lowest  
706 intensity and red represents the highest intensity. Scale bar= 50µm.

707

708 **Figure 5: PA-GFP-Tubulin spreads to a greater extent in embryos containing**  
709 **RhoGEF2 overexpression**

710 A. Embryos overexpressing RhoGEF2 show loss of metaphase furrows: Surface and  
711 sagittal views of fixed control or RhoGEF2 overexpressing embryos, stained with  
712 Tubulin (Red), Scribbled (Green) and DNA (Grey), show loss of furrows and no  
713 significant effect on metaphase spindles (100%, n=30 embryos). Scale bar=10 $\mu$ m.

714 B-E. Images from syncytial cycles of an embryo co-expressing RhoGEF2 along with  
715 PA-GFP (B) or PA-GFP-Tubulin (D) which has been photoactivated at the anterior pole.  
716 Kymograph for PA-GFP (C) and PA-GFP-Tubulin (E) shows increase in cortical  
717 fluorescence with time while sometimes changing the extent to which the fluorescence  
718 is confined. Scale bar=50 $\mu$ m, 60s.

719 F-G. Quantification of evolution of the photoactivation across nuclear cycles in embryos  
720 overexpressing RhoGEF2. A line profile was drawn in syncytial cycles is plotted for PA-  
721 GFP (F) and PA-GFP-Tubulin (G) for one embryo. Similar profiles were observed in  
722 multiple embryos (n=3 for each).

723 H-I. Quantification of extent of photoactivation in XY vs XZ direction for PA-GFP (H) and  
724 PA-GFP-Tubulin (I) in embryos overexpressing RhoGEF2. The raw data is shown in a  
725 lighter color and the averaged data is shown in a darker color, error bars represent  
726 standard error on means (n=3 embryos for PA-GFP and PA-GFP-Tubulin each).

727 J-K. Quantification of intensity profile of photoactivated probe as measured at the end of  
728 the experiment for PA-GFP (J) and PA-GFP-Tubulin (K) in embryos overexpressing  
729 RhoGEF2. The raw data is shown in a lighter color and the averaged data is shown in a  
730 darker color, error bars represent standard error on means (n=3 embryos for PA-GFP-  
731 Tubulin and PA-GFP each). The graph for photoactivation of PA-GFP and PA-GFP-  
732 Tubulin in control embryos is the same as that shown in Figure 3I and is repeated here  
733 for comparison.

734 L. Scatter plot of the length scales extracted after fitting an exponential decay function  
735 to the intensity profiles seen in J and K. The values of length scales for PA-GFP and  
736 PA-GFP-Tubulin for anterior photoactivation in control embryos are repeated from  
737 Figure 3J. (n=5,3 for PA-GFP in RhoGEF2-OE, 6,3 for PA-GFP-Tubulin in RhoGEF2-



738 OE. Two tailed Mann-Whitney non-parametric test, p value 0.53 for PA-GFP and PA-  
739 GFP-Tubulin in RhoGEF2-OE, 0.93 for PA-GFP/RhoGEF2-OE and PA-GFP/control,  
740 0.002 for PA-GFP-Tubulin/RhoGEF2-OE and PA-GFP-Tubulin/control).

741

742 **Figure 6: PA-GFP-Tubulin spreads to a greater extent in *eb1* mutant embryos**

743 A. *eb1* RNAi expressing embryos show perturbed tubulin architecture: Surface and  
744 sagittal views of fixed control or *eb1* RNAi embryos, stained with Tubulin (Red),  
745 Scribbled (Green) and DNA (Grey), show perturbed spindles in metaphase (100%, n=25  
746 embryos). Scale bar=10 $\mu$ m.

747 B-E. Images from syncytial cycles of an *eb1* RNAi expressing embryo co-expressing  
748 PA-GFP (B) or PA-GFP-Tubulin (D) with photoactivation at the anterior pole.

749 Kymograph for PA-GFP (B) and PA-GFP-Tubulin (E) shows increase in cortical  
750 fluorescence across time while sometimes changing the extent to which the  
751 fluorescence is confined. Scale bar=50 $\mu$ m, 60s.

752 F-G. Quantification of evolution of photoactivated signal across nuclear cycles in *eb1*  
753 RNAi embryos. Graph depicts intensity change in PA-GFP (F) and PA-GFP-Tubulin (G)  
754 for one embryo. Similar profiles were observed in multiple embryos (n=3 for each).

755 H-I. Quantification of the extent of photoactivated probe spread in XY vs XZ direction for  
756 PA-GFP (H) and PA-GFP-Tubulin (I) in *eb1* RNAi embryos. The raw data is shown in a  
757 lighter color and the averaged data is shown in a darker color, error bars represent  
758 standard error on means (n=3 embryos for PA-GFP and PA-GFP-Tubulin each).

759 J-K. Quantification of intensity profile of photoactivated probe as measured at the end of  
760 the experiment for PA-GFP (J) and PA-GFP-Tubulin (K) in *eb1* RNAi embryos. The raw  
761 data is shown in a lighter color and the averaged data is shown in a darker color, error  
762 bars represent standard error on means (n=3 embryos for PA-GFP-Tubulin and PA-  
763 GFP each). The graph for photoactivation of PA-GFP and PA-GFP-Tubulin in control  
764 embryos is the same as that shown in Figure 3I and is repeated here for comparison.

765 L. Scatter plot of length scales extracted after fitting an exponential decay function to  
766 the intensity profiles seen in J and K. The values of length scales for PA-GFP and PA-  
767 GFP-Tubulin for anterior photoactivation in control embryos are repeated from Figure  
768 3J. (n=6,3 embryos for PA-GFP in *eb1* RNAi, 6,3 for PA-GFP-Tubulin in *eb1* RNAi. Two

769 tailed Mann-Whitney non-parametric test, p value 0.81 for PA-GFP and PA-GFP-  
770 Tubulin in *eb1* RNAi, 0.02 for PA-GFP/*eb1* RNAi and PA-GFP/control, 0.04 for PA-GFP-  
771 Tubulin/*eb1* RNAi and PA-GFP-Tubulin/control).

772

773 **Figure 7: Model for regulation of gradient formation across the nucleo-**  
774 **cytoplasmic domains in the syncytial *Drosophila* embryo**

775 Photoactivated PA-GFP-Tubulin and PA-GFP form a cortical gradient in the syncytial  
776 blastoderm embryo. RhoGEF2 overexpression causes loss of plasma membrane  
777 furrows and increased spread of the anteriorly induced PA-GFP-Tubulin gradient. EB1  
778 loss causes perturbation of the microtubule cytoskeleton and increased spread of the  
779 anteriorly induced PA-GFP-Tubulin gradient.

780

781 **Supplementary Movies**

782

783 S1: Cytoplasmic GFP: GFP expressed under the *ubi* promoter is imaged across the  
784 syncytial division cycles. Note that GFP enters the nuclei in interphase.

785 S2: mCherry-Tubulin: mCherry-Tubulin expressed with *mat*-Gal4 is imaged in the  
786 syncytial division cycles. Note mCherry-Tubulin incorporation into centrosome, spindle  
787 and cortical microtubules.

788 S3: PA-GFP anterior photoactivation: Region of interest at the anterior is photoactivated  
789 to create a source of PA-GFP. Note that PA-GFP enters the nuclei in interphase.

790 S4: PA-GFP-Tubulin anterior photoactivation: Region of interest at the anterior is  
791 photoactivated to create a source of PA-GFP-Tubulin. Note PA-GFP-Tubulin  
792 incorporation into centrosome, spindle and cortical microtubules.

793 S5: PA-GFP middle photoactivation: Region of interest in the middle of the embryo is  
794 photoactivated to create a source of PA-GFP.

795 S6: PA-GFP-Tubulin middle photoactivation: Region of interest in the middle of the  
796 embryo is photoactivated to create a source of PA-GFP-Tubulin.

797 S7: PA-GFP anterior photoactivation in RhoGEF2-OE embryos: Region of interest at  
798 the anterior is photoactivated to create a source of PA-GFP in RhoGEF2-OE embryos.

799 S8: PA-GFP-Tubulin anterior photoactivation in RhoGEF2 mutants: Region of interest at  
800 the anterior is photoactivated to create a source of PA-GFP-Tubulin in RhoGEF2-OE  
801 embryos.

802 S9: PA-GFP anterior photoactivation in *eb1* mutant embryos: Region of interest at the  
803 anterior is photoactivated to create a source of PA-GFP in *eb1* RNAi expressing  
804 embryos

805 S10: PA-GFP-Tubulin anterior photoactivation in EB1 mutants: Region of interest at the  
806 anterior is photoactivated to create a source of PA-GFP-Tubulin in *eb1* RNAi expressing  
807 embryos. Note the undulations caused by yolk contractions and that the cytoplasm  
808 remains peripheral, without mixing with the embryo yolk region.

809 All movies are in shown in 16 color intensity rainbow scale where Blue represents the  
810 lowest intensity and red represents the highest intensity. Scale bar=10 $\mu$ m or 50 $\mu$ m as  
811 mentioned.

812

813

## 814 **References**

815 ANDERSON CA, ESER U, KORNDORF T, BORSUK ME, SKOTHEIM JM, GLADFELTER AS  
816 (2013). Nuclear Repulsion Enables Division Autonomy in a Single Cytoplasm. *CurrBiol* 23:  
817 1999–2010.

818 BALASUBRAMANIAN R, ZHANG X (2016). Mechanisms of FGF gradient formation during  
819 embryogenesis. *Semin Cell Dev Biol* 53: 94–100.

820 BARMCHI MP, ROGERS S, HÄCKER U (2005). DRhoGEF2 regulates actin organization and  
821 contractility in the Drosophila blastoderm embryo. *J Cell Biol* 168: 575–585.

822 BEREZHKOVSII AM, SAMPLE C, SHVARTSMAN SY (2010). How long does it take to  
823 establish a morphogen gradient? *Biophys J* 99: L59–61.

824 BLANKENSHIP JT, WIESCHAUS E (2001). Two new roles for the Drosophila AP patterning  
825 system in early morphogenesis. *Development* 128: 5129–5138.

826 CAI X, AKBER M, SPIROV A, BAUMGARTNER S (2017). Cortical movement of Bicoid in early  
827 Drosophila embryos is actin- and microtubule-dependent and disagrees with the SDD  
828 diffusion model. *PLoS One* 12: e0185443.

829 CAO J, ALBERTSON R, RIGGS B, FIELD CM, SULLIVAN W (2008). Nuf, a Rab11 effector,  
830 maintains cytokinetic furrow integrity by promoting local actin polymerization. *J Cell Biol*  
831 182: 301–313.

832 CAO J, CREST J, FASULO B, SULLIVAN W (2010). Cortical actin dynamics facilitate early-

- 833 stage centrosome separation. *CurrBiol* 20: 770–776.
- 834 CARRELL SN, O'CONNELL MD, JACOBSEN T, ALLEN AE, SMITH SM, REEVES GT (2017).  
835 A facilitated diffusion mechanism establishes the Drosophila Dorsal gradient. *Development*.  
836 dev.155549.
- 837 CHEN J, LIPPINCOTT-SCHWARTZ J, LIU J (2012). Intracellular spatial localization regulated  
838 by the microtubule network. *PLoS One* 7: e34919.
- 839 CHOWDHARY S, TOMER D, DUBAL D, SAMBRE D, RIKHY R (2017). Analysis of  
840 mitochondrial organization and function in the Drosophila blastoderm embryo. *Sci Rep* 7:  
841 5502.
- 842 CREST J, CONCHA-MOORE K, SULLIVAN W (2012). RhoGEF and Positioning of Rappaport-  
843 like Furrows in the Early Drosophila Embryo. *CurrBiol* 22: 2037–2041.
- 844 CRICK F (1970). Diffusion in Embryogenesis. *Nature* 225: 420–422.
- 845 DANIELS BR, RIKHY R, RENZ M, DOBROWSKY TM, LIPPINCOTT-SCHWARTZ J (2012).  
846 Multiscale diffusion in the mitotic Drosophila melanogaster syncytial blastoderm. *Proc Natl*  
847 *Acad Sci U S A* 109: 8588–8593.
- 848 DELOTTO R, DELOTTO Y, STEWARD R, LIPPINCOTT-SCHWARTZ J (2007).  
849 Nucleocytoplasmic shuttling mediates the dynamic maintenance of nuclear Dorsal levels  
850 during Drosophila embryogenesis. *Development* 134: 4233–4241.
- 851 DUNDON SER, CHANG S-S, KUMAR A, OCCHIPINTI P, SHROFF H, ROPER M,  
852 GLADFELTER AS (2016). Clustered nuclei maintain autonomy and nucleocytoplasmic ratio  
853 control in a syncytium. *MolBiol Cell* 27: 2000–2007.
- 854 DURRIEU L, KIRRMAYER D, SCHNEIDT T, KATS I, RAGHAVAN S, HUFNAGEL L,  
855 SAUNDERS TE, KNOP M (2018). Bicoid gradient formation mechanism and dynamics  
856 revealed by protein lifetime analysis. *MolSystBiol* 14: e8355.
- 857 FAHMY K, AKBER M, CAI X, KOUL A, HAYDER A, BAUMGARTNER S (2014).  $\alpha$ Tubulin 67C  
858 and Ncd are essential for establishing a cortical microtubular network and formation of the  
859 Bicoid mRNA gradient in Drosophila. *PLoS One* 9: e112053.
- 860 FIGARD L, XU H, GARCIA HG, GOLDING I, SOKAC AM (2013). The plasma membrane  
861 flattens out to fuel cell-surface growth during Drosophila cellularization. *Dev Cell* 27: 648–  
862 655.
- 863 FOE,ODELL AND EDGAR (1993). Mitosis and morphogenesis in the Drosophila embryo: point  
864 and counterpoint. In *The Development of Drosophila melanogaster* (Ed. AMA Michael  
865 Bates). Cold Spring Harbor Laboratory Press., pp. 149–300.
- 866 FOE VE, ALBERTS BM (1983). Studies of nuclear and cytoplasmic behaviour during the five  
867 mitotic cycles that precede gastrulation in Drosophila embryogenesis. *J Cell Sci* 61: 31–70.
- 868 FRESCAS D, MAVRAKIS M, LORENZ H, DELOTTO R, LIPPINCOTT-SCHWARTZ J (2006).  
869 The secretory membrane system in the Drosophila syncytial blastoderm embryo exists as  
870 functionally compartmentalized units around individual nuclei. *J Cell Biol* 173: 219–230.

- 871 GAUTHIER-KEMPER A, WEISSMANN C, REYHER H-J, BRANDT R (2012). Monitoring  
872 cytoskeletal dynamics in living neurons using fluorescence photoactivation. *Methods*  
873 *Enzymol* 505: 3–21.
- 874 GOODSELL DS (2013). *The Machinery of Life*. Springer Science & Business Media.
- 875 GREGOR T, BIALEK W, DE RUYTER VAN STEVENINCK RR, TANK DW, WIESCHAUS EF  
876 (2005). Diffusion and scaling during early embryonic pattern formation. *Proc Natl Acad Sci*  
877 *U S A* 102: 18403–18407.
- 878 GREGOR T, WIESCHAUS EF, MCGREGOR AP, BIALEK W, TANK DW (2007). Stability and  
879 nuclear dynamics of the bicoid morphogen gradient. *Cell* 130: 141–152.
- 880 GRIMM O, COPPEY M, WIESCHAUS E (2010). Modelling the Bicoid gradient. *Development*  
881 137: 2253–2264.
- 882 GURA SADOVSKY R, BRIELLE S, KAGANOVICH D, ENGLAND JL (2017). Measurement of  
883 Rapid Protein Diffusion in the Cytoplasm by Photo-Converted Intensity Profile Expansion.  
884 *Cell Rep* 18: 2795–2806.
- 885 KARR TL (1986). Organization of the cytoskeleton in early *Drosophila* embryos. *J Cell Biol* 102:  
886 1494–1509.
- 887 KELLOGG DR, MITCHISON TJ, ALBERTS BM (1988). Behaviour of microtubules and actin  
888 filaments in living *Drosophila* embryos. *Development* 103: 675–686.
- 889 KUHN H, SOPKO R, COUGHLIN M, PERRIMON N, MITCHISON T (2015). The Atg1-Tor  
890 pathway regulates yolk catabolism in *Drosophila* embryos. *Development* 142: 3869–3878.
- 891 LEE C, ZHANG H, BAKER AE, OCCHIPINTI P, BORSUK ME, GLADFELTER AS (2013).  
892 Protein aggregation behavior regulates cyclin transcript localization and cell-cycle control.  
893 *Dev Cell* 25: 572–584.
- 894 LITTLE SC, TKAČIK G, KNEELAND TB, WIESCHAUS EF, GREGOR T (2011). The formation  
895 of the Bicoid morphogen gradient requires protein movement from anteriorly localized  
896 mRNA. *PLoS Biol* 9: e1000596.
- 897 LUBY-PHELPS K (2000). Cytoarchitecture and physical properties of cytoplasm: volume,  
898 viscosity, diffusion, intracellular surface area. *Int Rev Cytol* 192: 189–221.
- 899 MAVRAKIS M, RIKHY R, LIPPINCOTT-SCHWARTZ J (2009a). Cells within a cell: Insights into  
900 cellular architecture and polarization from the organization of the early fly embryo.  
901 *Commun Integr Biol* 2: 313–314.
- 902 MAVRAKIS M, RIKHY R, LIPPINCOTT-SCHWARTZ J (2009b). Plasma membrane polarity and  
903 compartmentalization are established before cellularization in the fly embryo. *Dev Cell* 16:  
904 93–104.
- 905 PARRY BR, SUROVTSEV IV, CABEEN MT, O'HERN CS, DUFRESNE ER, JACOBS-  
906 WAGNER C (2014). The bacterial cytoplasm has glass-like properties and is fluidized by  
907 metabolic activity. *Cell* 156: 183–194.
- 908 PAVLATH GK, RICH K, WEBSTER SG, BLAU HM (1989). Localization of muscle gene

- 909 products in nuclear domains. *Nature* 337: 570–573.
- 910 ROGERS SL, ROGERS GC, SHARP DJ, VALE RD (2002). Drosophila EB1 is important for  
911 proper assembly, dynamics, and positioning of the mitotic spindle. *J Cell Biol* 158: 873–884.
- 912 RUIWEN WANG MGB (2007). The maximal size of protein to diffuse through the nuclear pore is  
913 larger than 60kDa. *FEBS Lett* 581: 3164.
- 914 RUPPRECHT J-F, ONG KH, YIN J, HUANG A, DINH H-H-Q, SINGH AP, ZHANG S, YU W,  
915 SAUNDERS TE (2017). Geometric constraints alter cell arrangements within curved  
916 epithelial tissues. *MolBiol Cell* 28: 3582–3594.
- 917 RUSAN NM, PEIFER M (2007). A role for a novel centrosome cycle in asymmetric cell division.  
918 *J Cell Biol* 177: 13–20.
- 919 SCHMIDT A, GROSSHANS J (2018). Dynamics of cortical domains in early development. *J Cell*  
920 *Sci* 131.
- 921 SHERLEKAR A, RIKHY R (2016). Syndapin promotes pseudocleavage furrow formation by  
922 actin organization in the syncytial Drosophila embryo. *MolBiol Cell* 27: 2064–2079.
- 923 SHVARTSMAN SY, COPPEY M, BEREZHKOVSII AM (2008). Dynamics of maternal  
924 morphogen gradients in Drosophila. *CurrOpin Genet Dev* 18: 342–347.
- 925 SPIROV A, FAHMY K, SCHNEIDER M, FREI E, NOLL M, BAUMGARTNER S (2009).  
926 Formation of the bicoid morphogen gradient: an mRNA gradient dictates the protein  
927 gradient. *Development* 136: 605–614.
- 928 SULLIVAN W, THEURKAUF WE (1995). The cytoskeleton and morphogenesis of the early  
929 Drosophila embryo. *CurrOpin Cell Biol* 7: 18–22.
- 930 TURNER FR, MAHOWALD AP (1976). Scanning electron microscopy of Drosophila  
931 embryogenesis: 1. The structure of the egg envelopes and the formation of the cellular  
932 blastoderm. *Dev Biol* 50: 95–108.
- 933 VERKMAN AS (1999). [22] Green fluorescent protein as a probe to study intracellular solute  
934 diffusion. In *Methods in Enzymology* Academic Press, pp. 250–264.
- 935 WARN RM (1986). The cytoskeleton of the early Drosophila embryo. *J Cell Sci Suppl* 5: 311–  
936 328.
- 937 WELTE MA (2015). As the fat flies: The dynamic lipid droplets of Drosophila embryos.  
938 *BiochimBiophys Acta* 1851: 1156–1185.
- 939 WESSEL AD, GUMALLA M, GROSSHANS J, SCHMIDT CF (2015). The mechanical properties  
940 of early Drosophila embryos measured by high-speed video microrheology. *Biophys J* 108:  
941 1899–1907.
- 942 ZHANG Y, YU JC, JIANG T, FERNANDEZ-GONZALEZ R, HARRIS TJC (2018). Collision of  
943 Expanding Actin Caps with Actomyosin Borders for Cortical Bending and Mitotic Rounding  
944 in a Syncytium. *Dev Cell* 45: 551–564.e4.
- 945

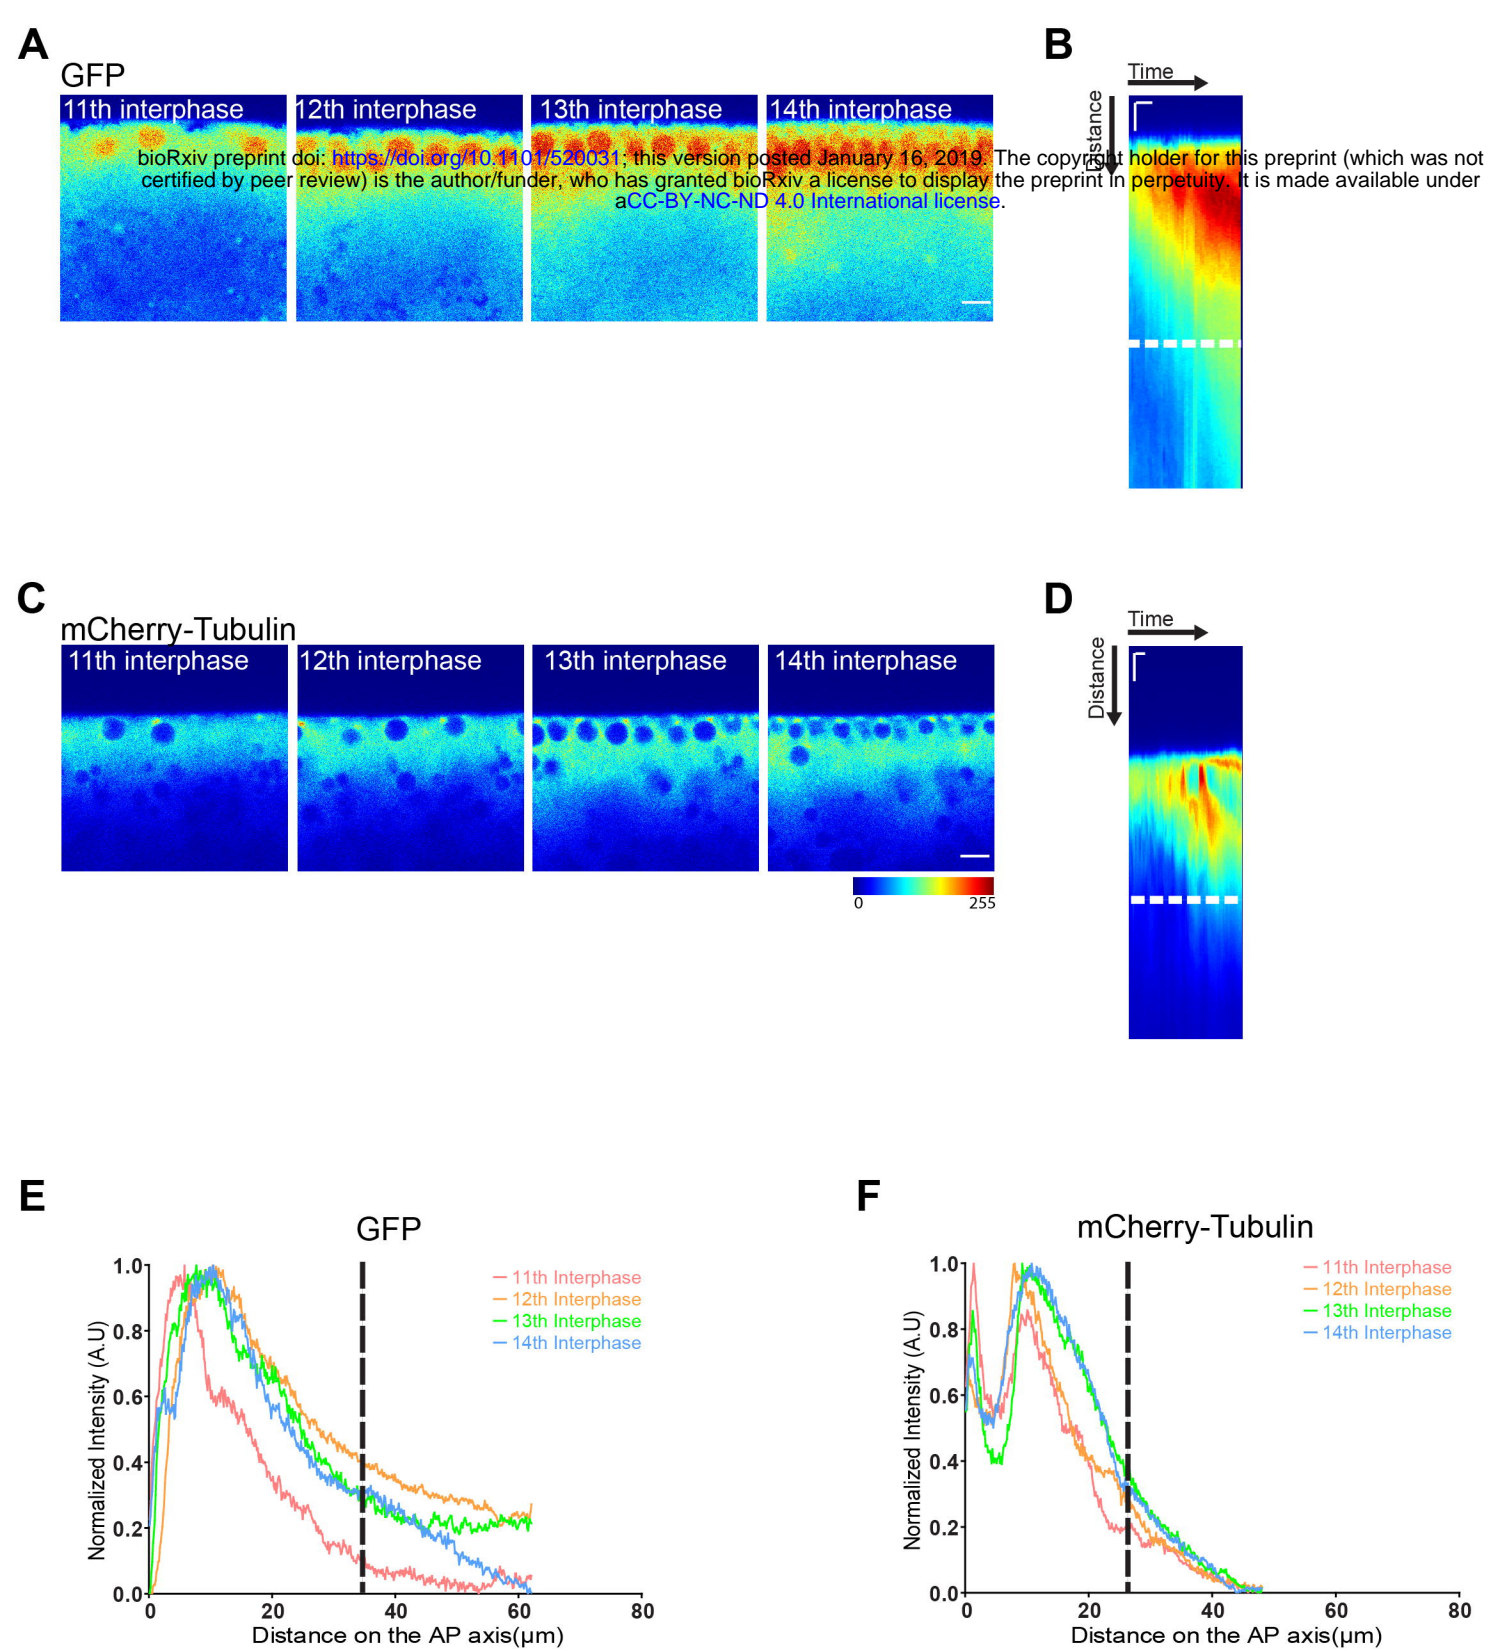

**A**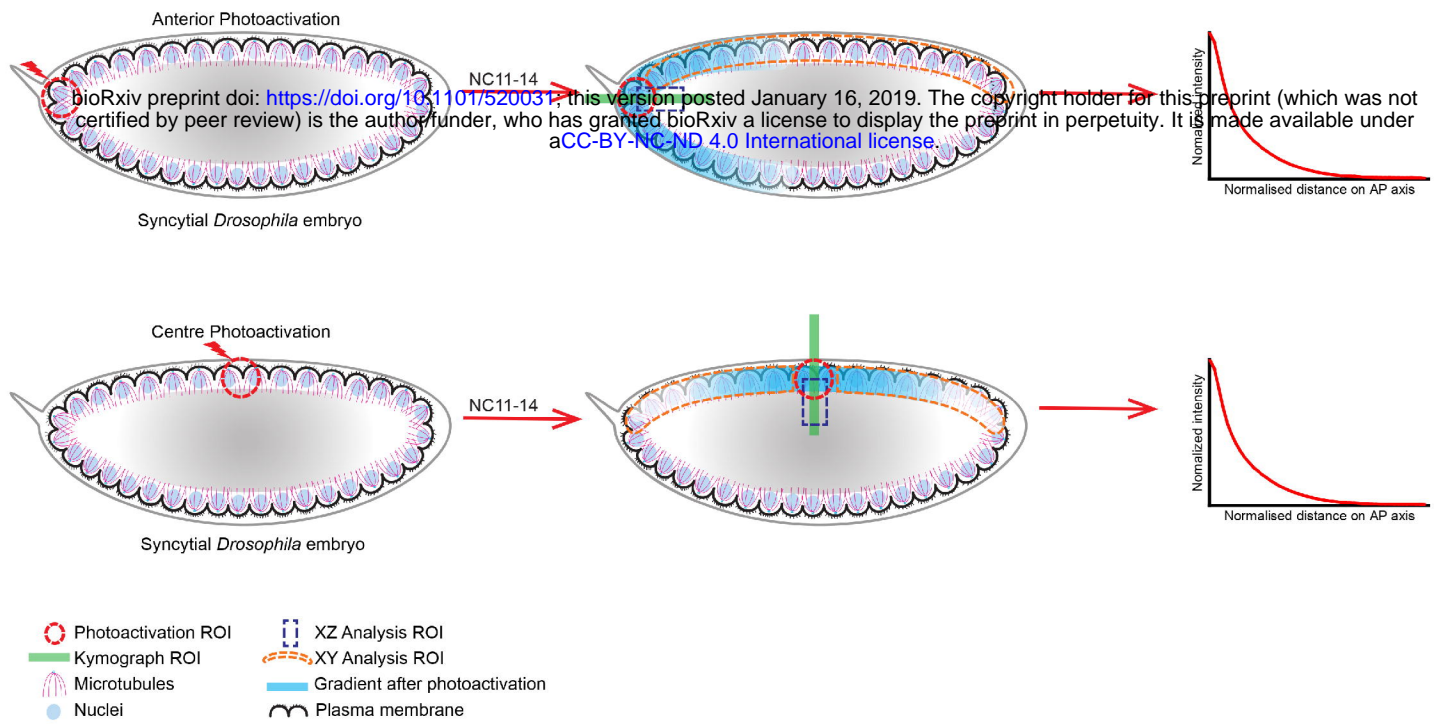**B**

PA-GFP

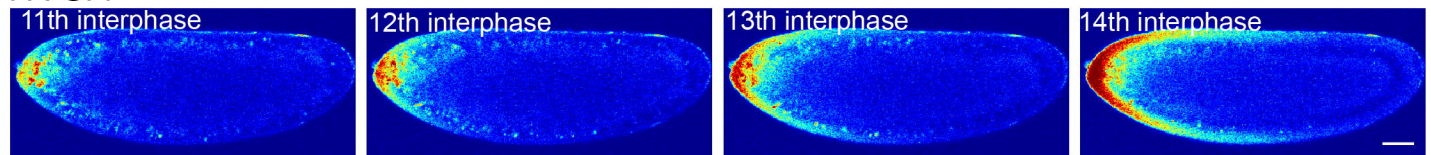**C**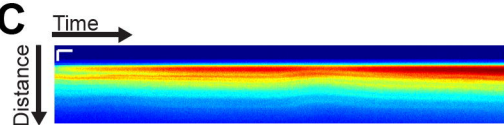**D**

PA-GFP-Tubulin

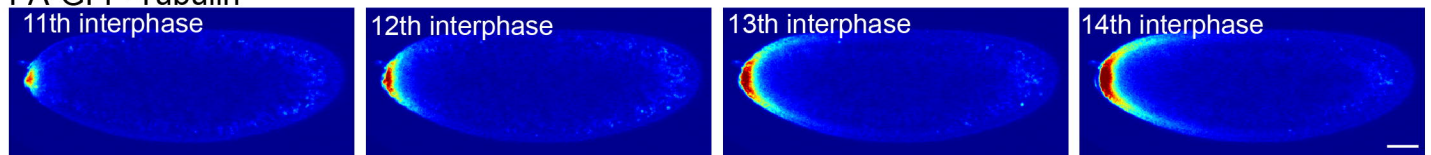**E**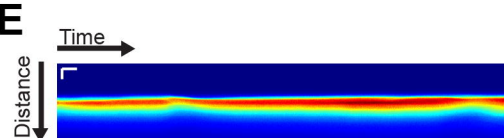**F**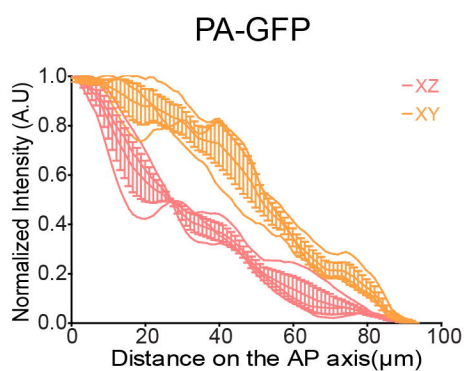**G**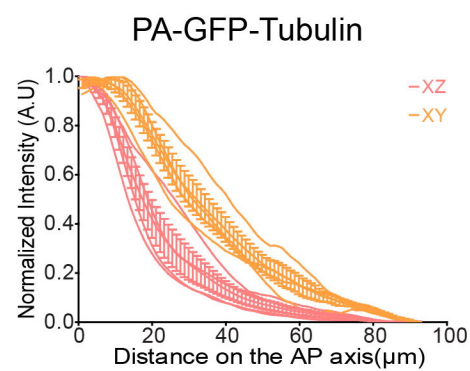



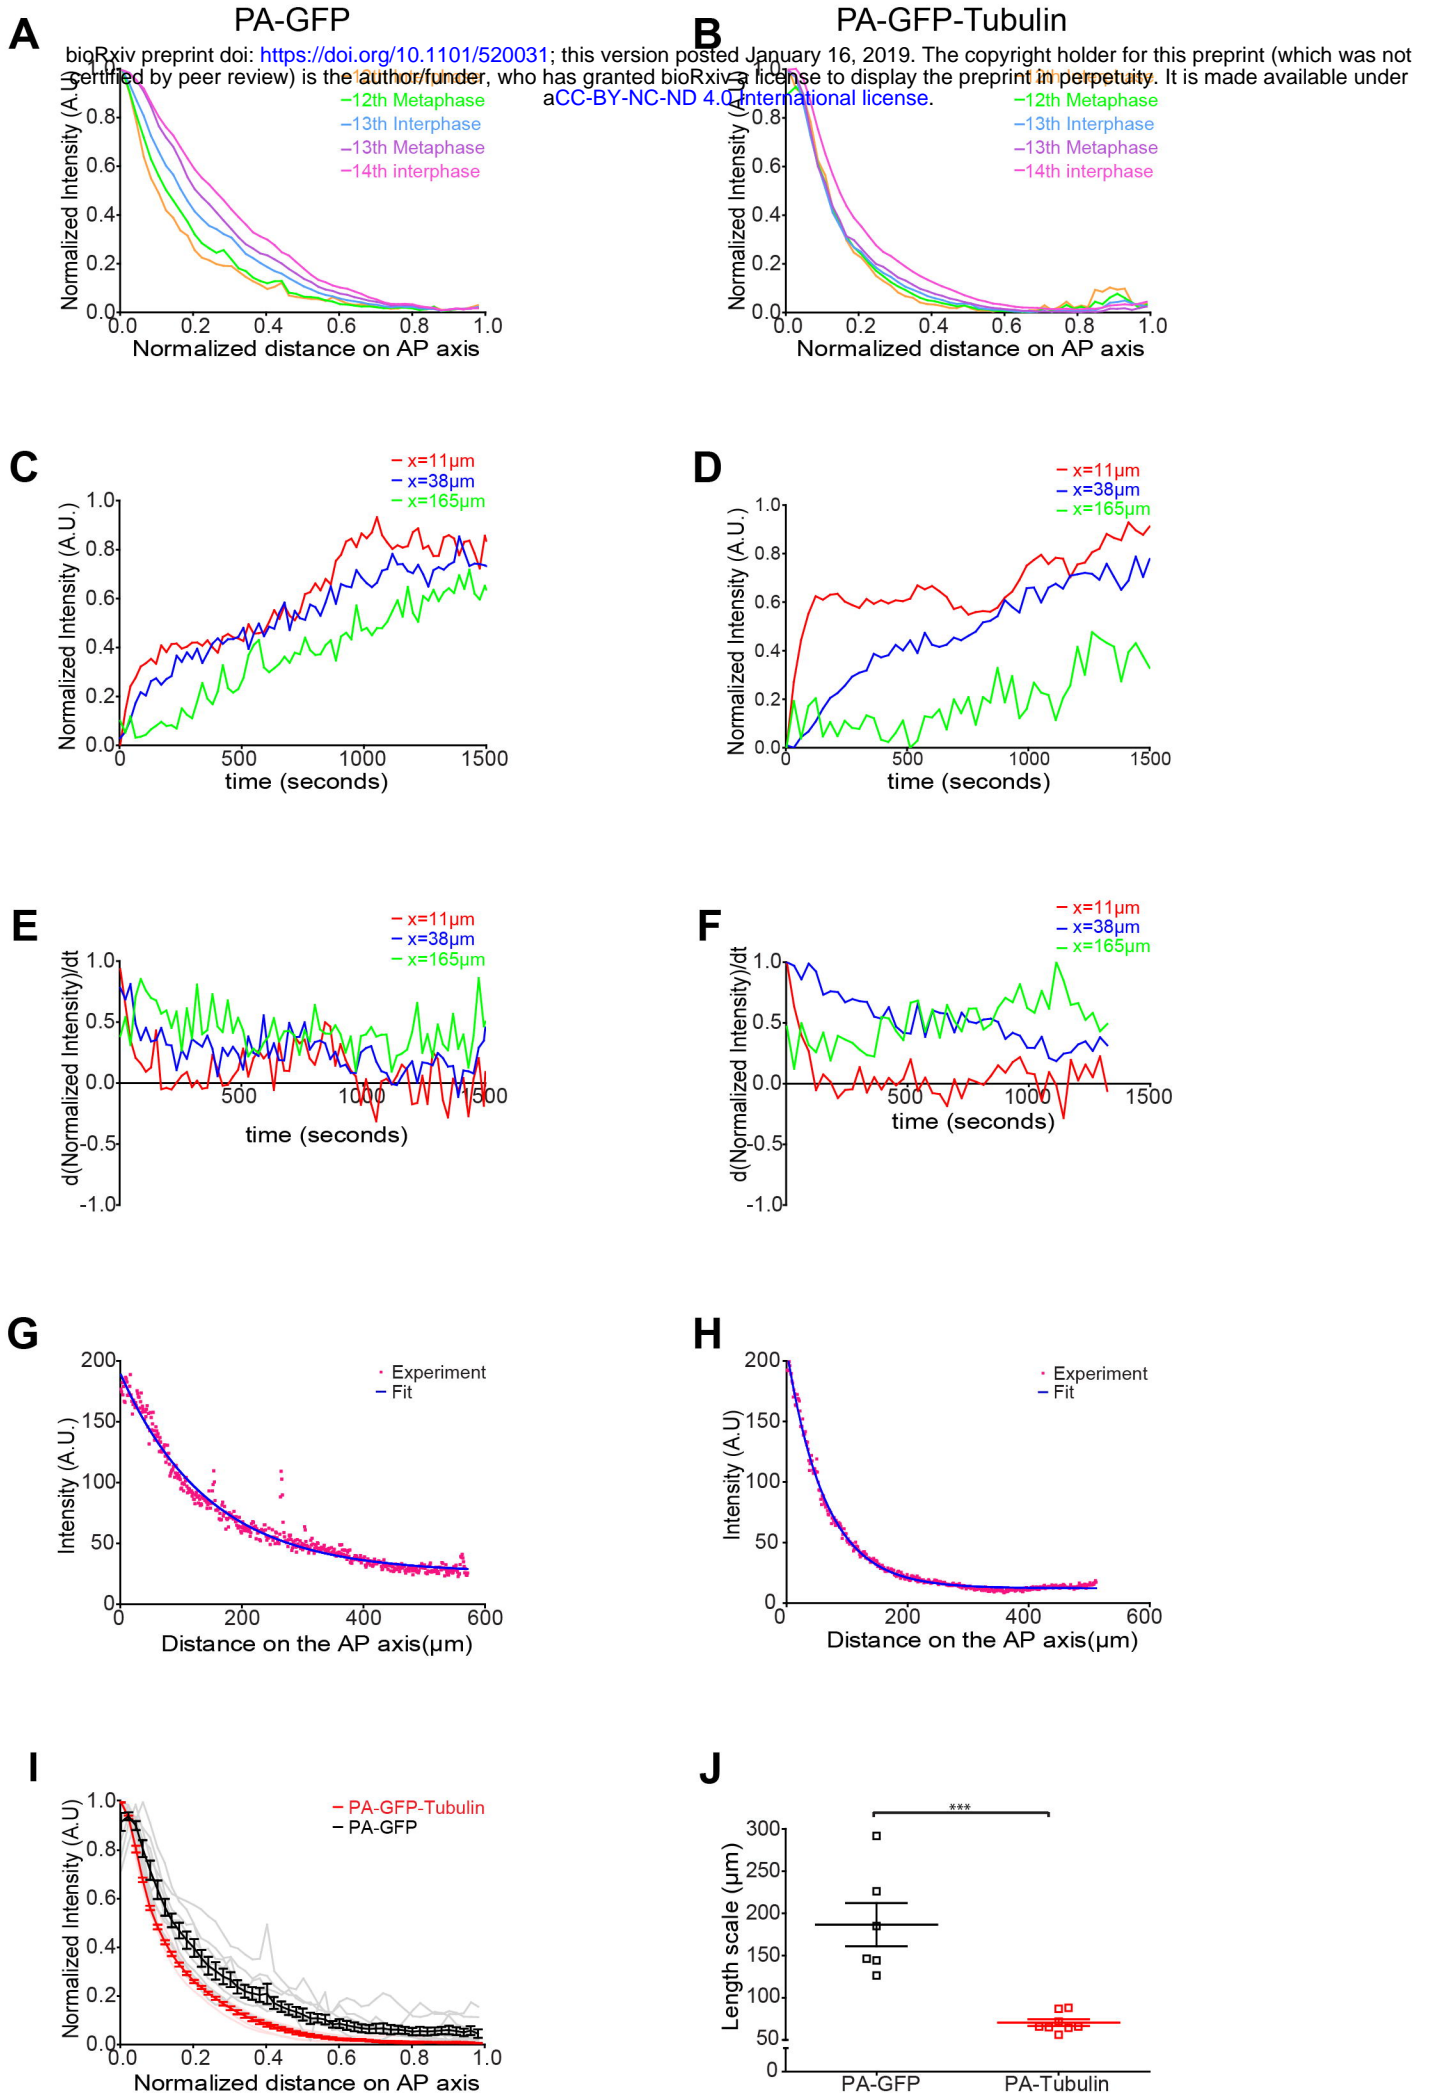

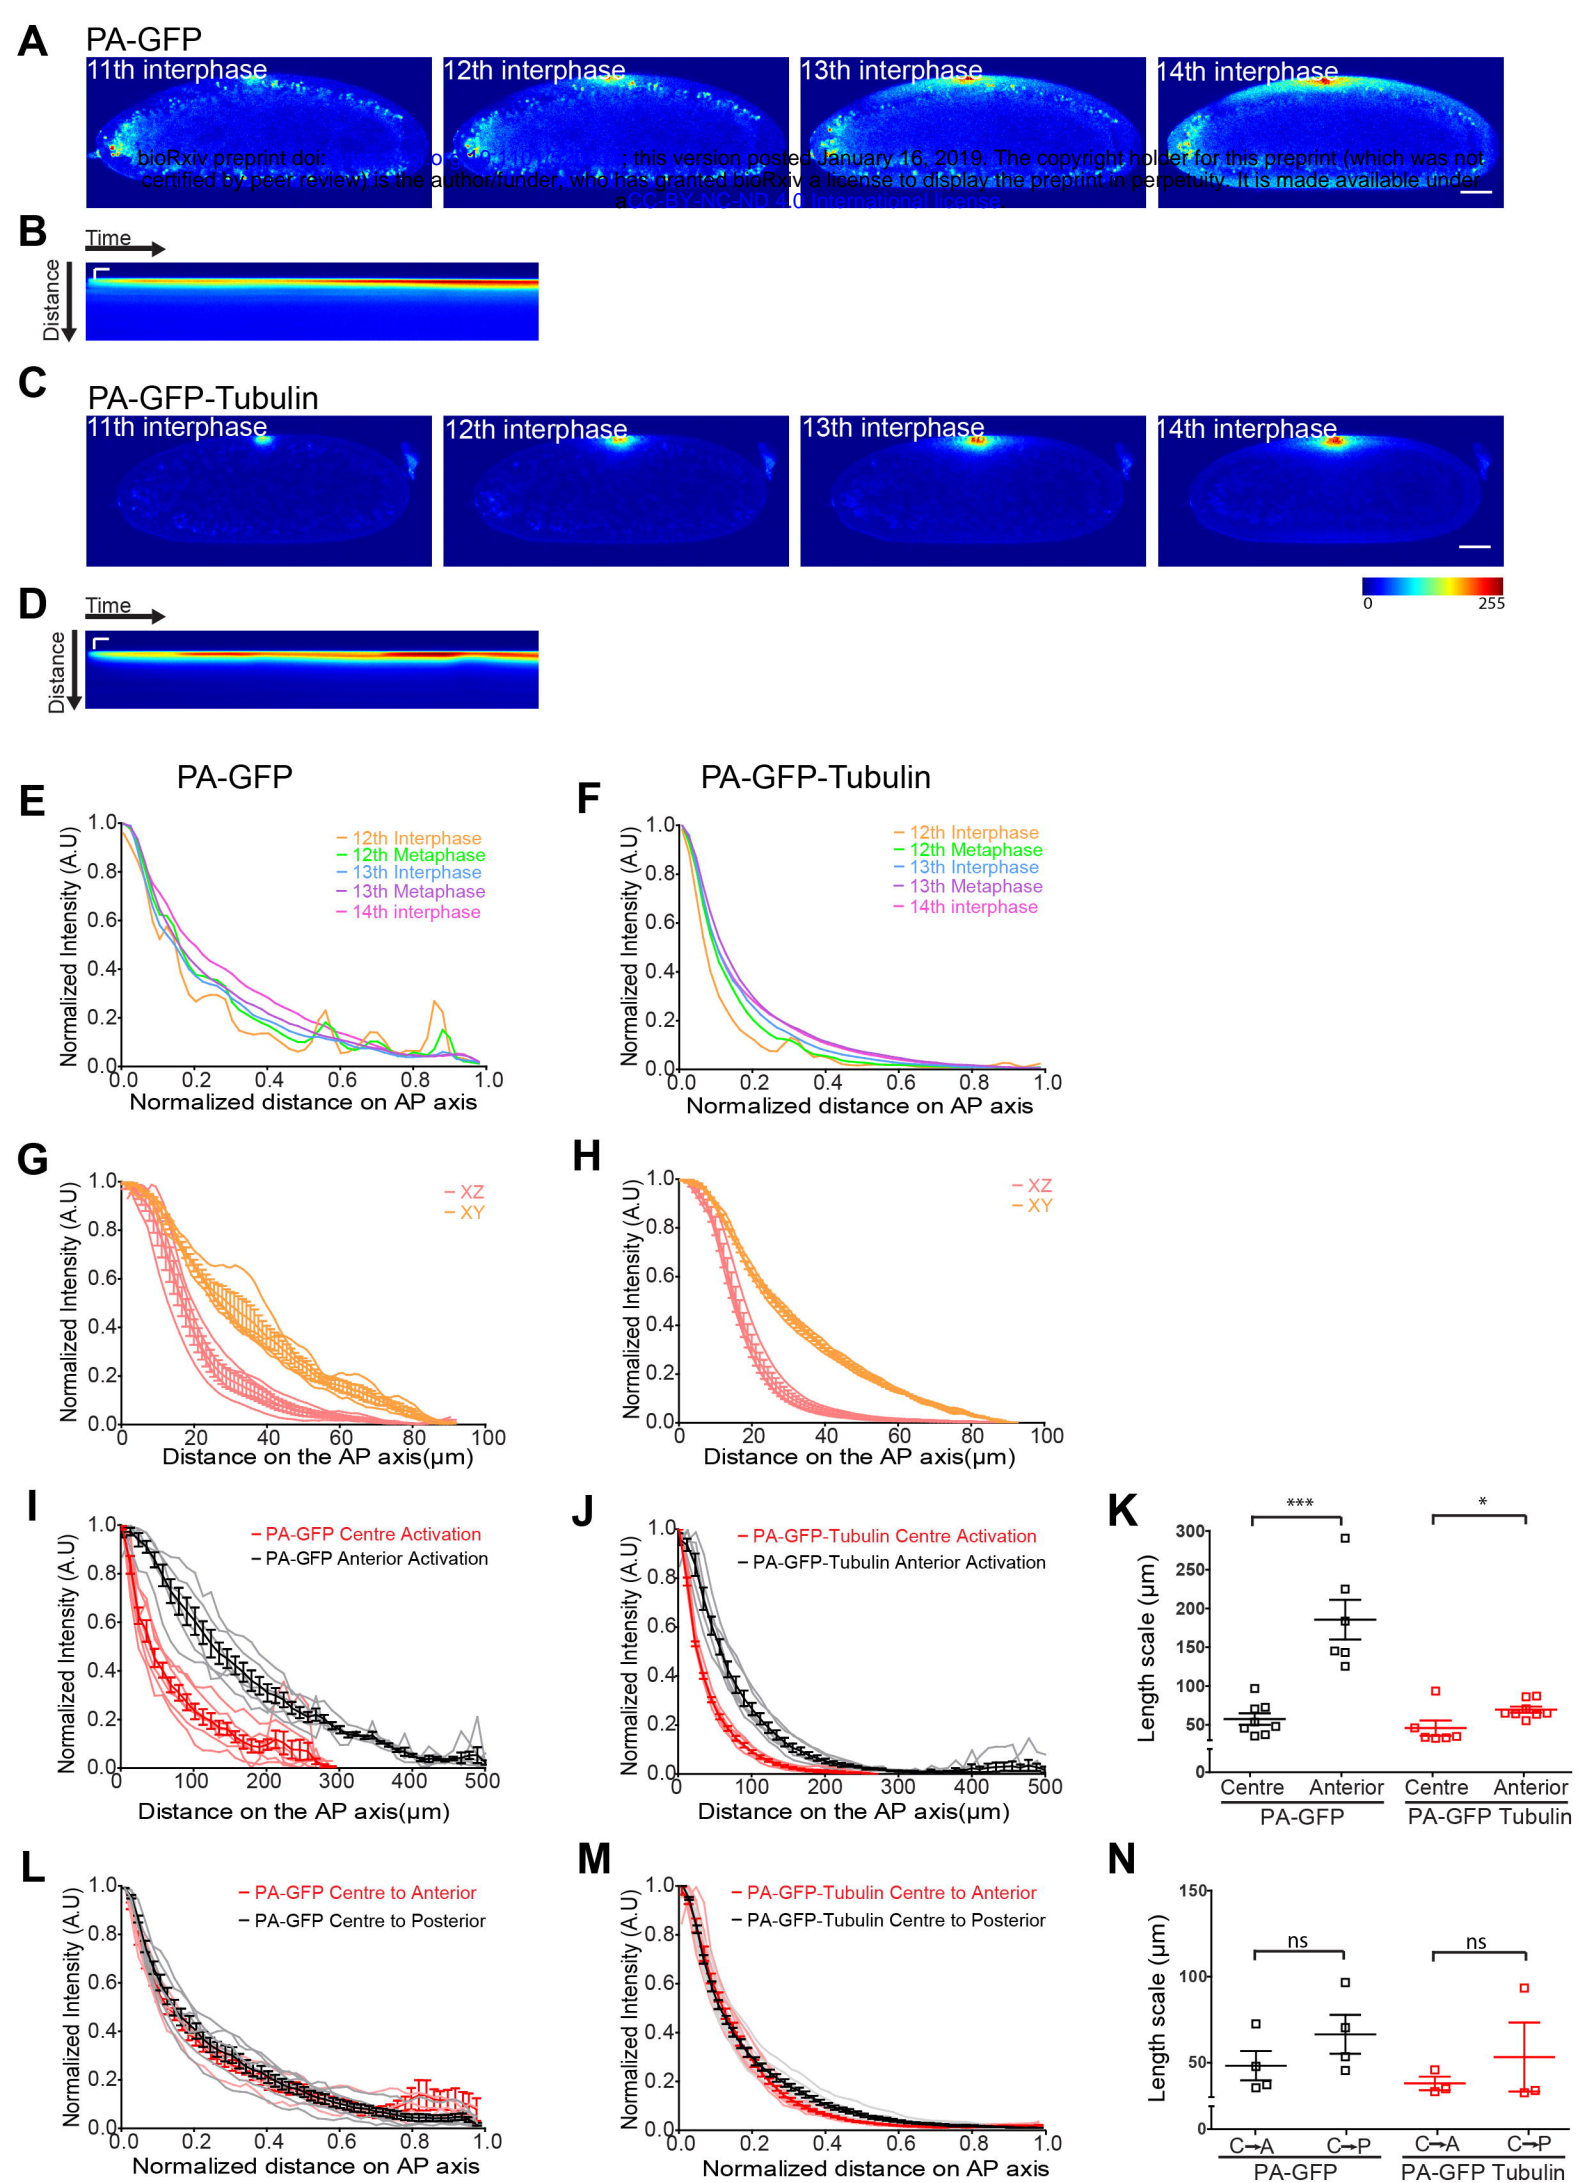

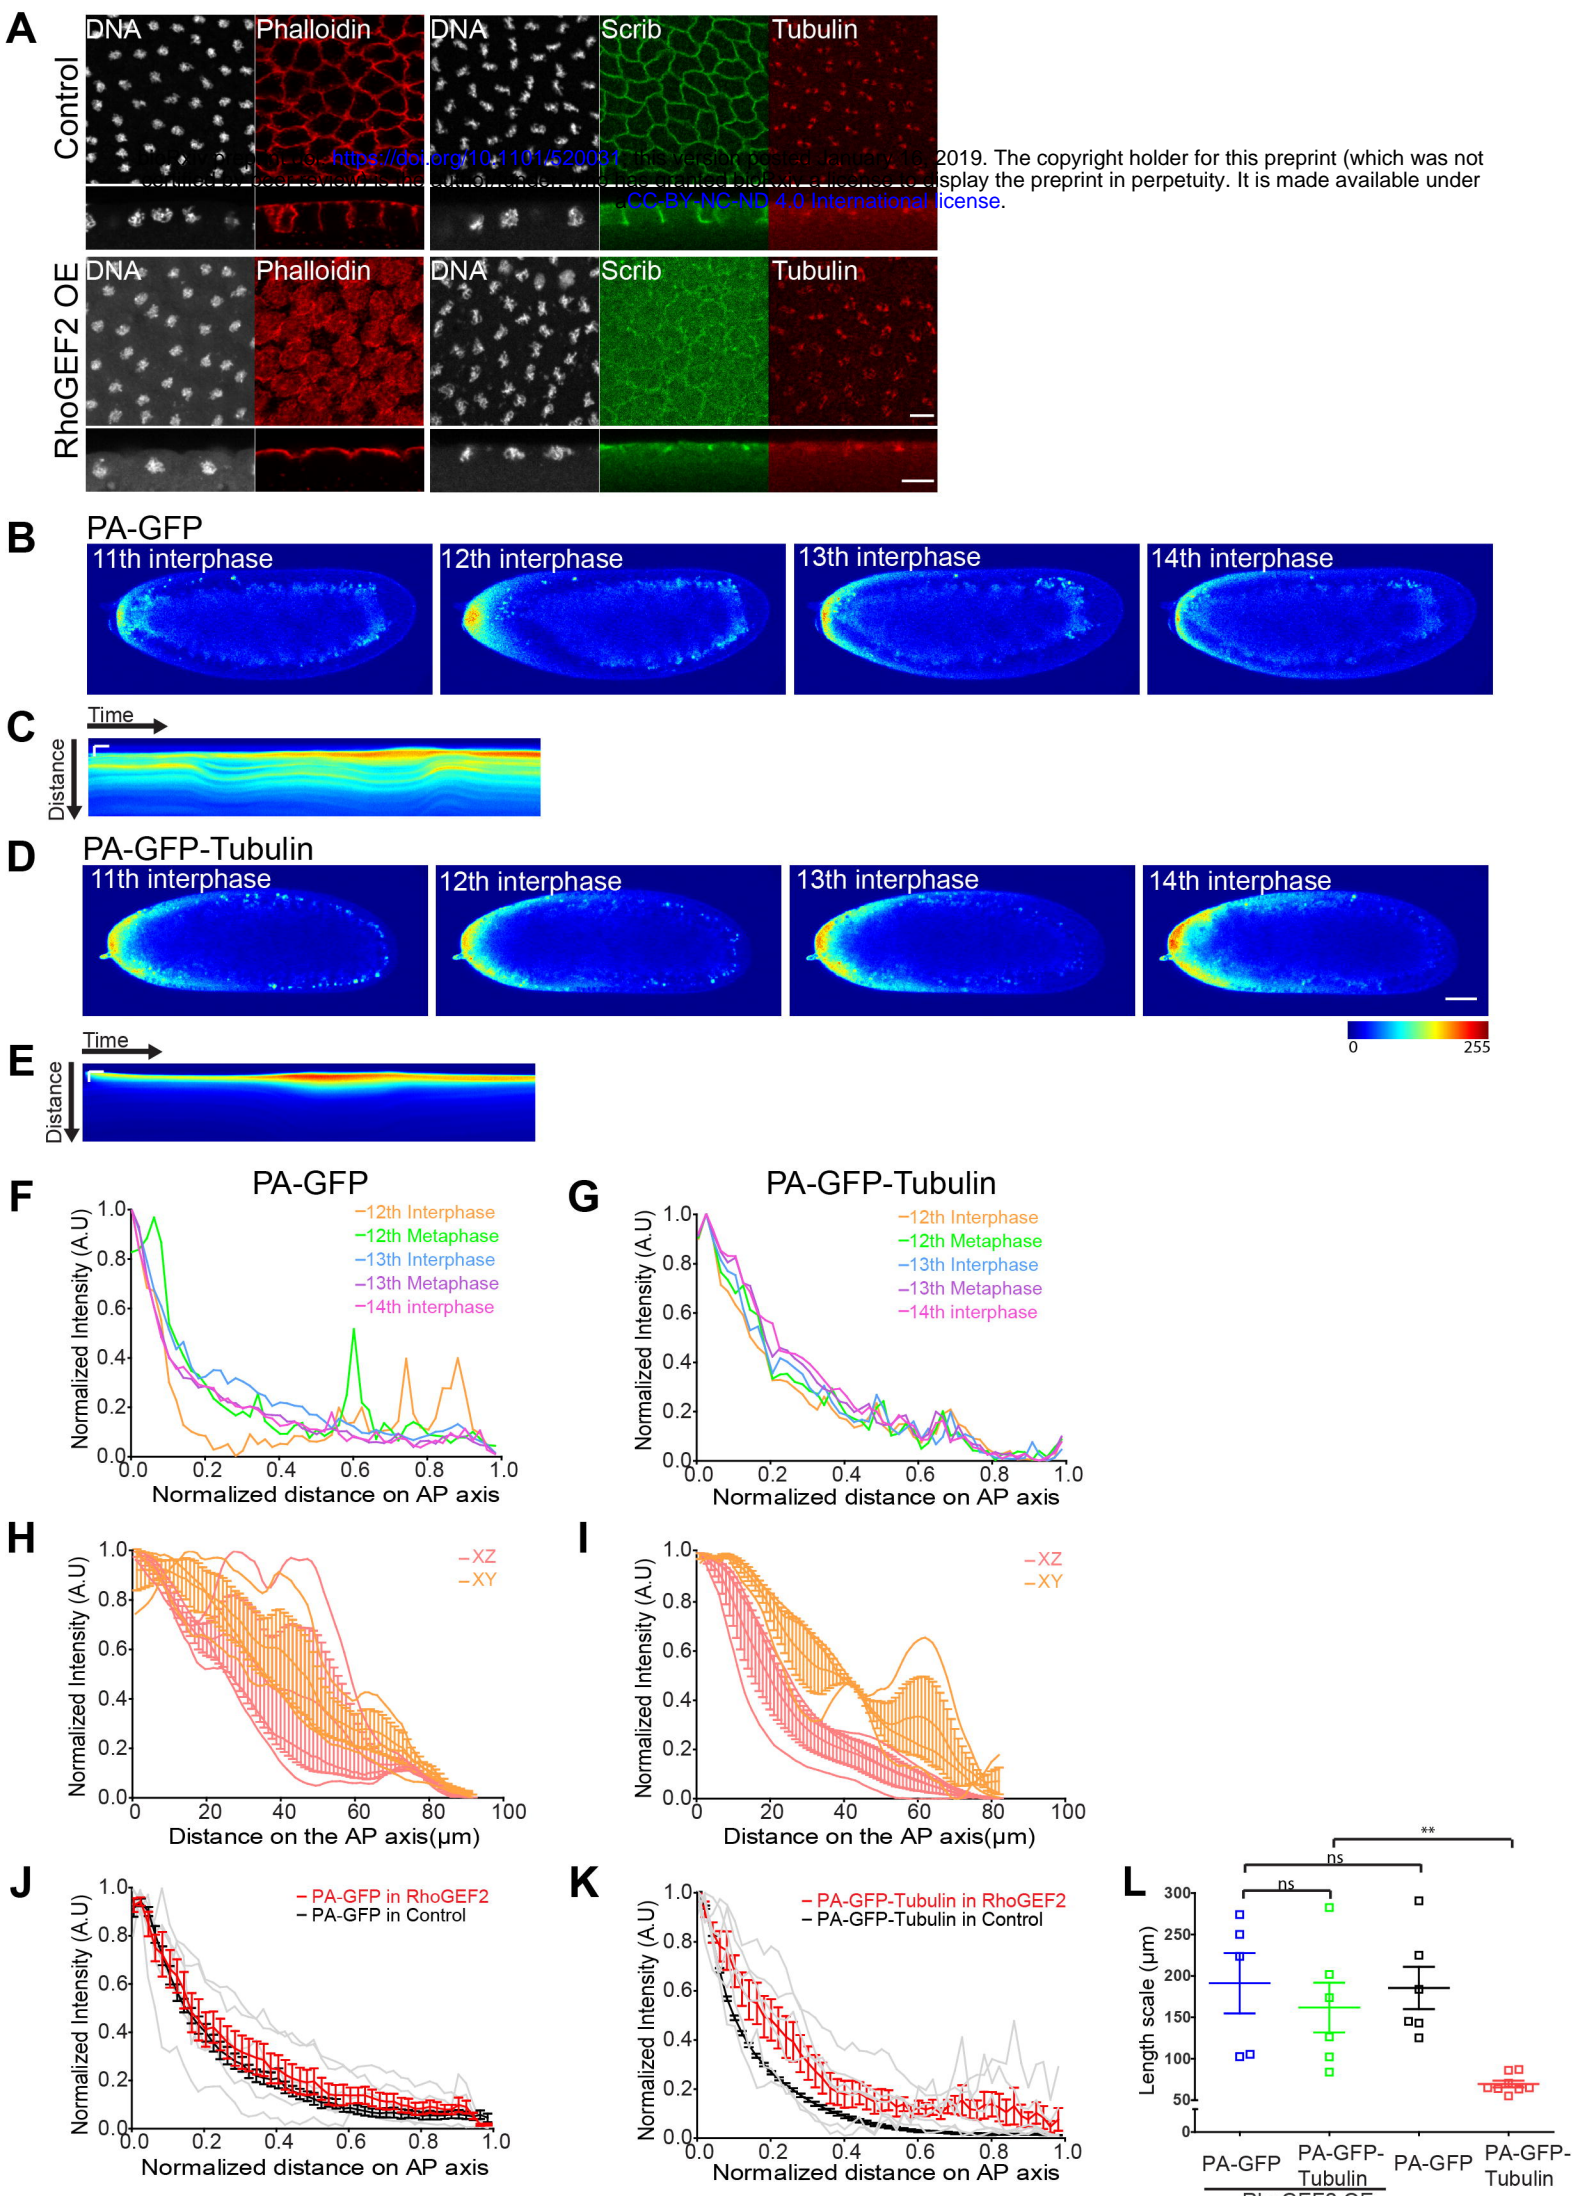

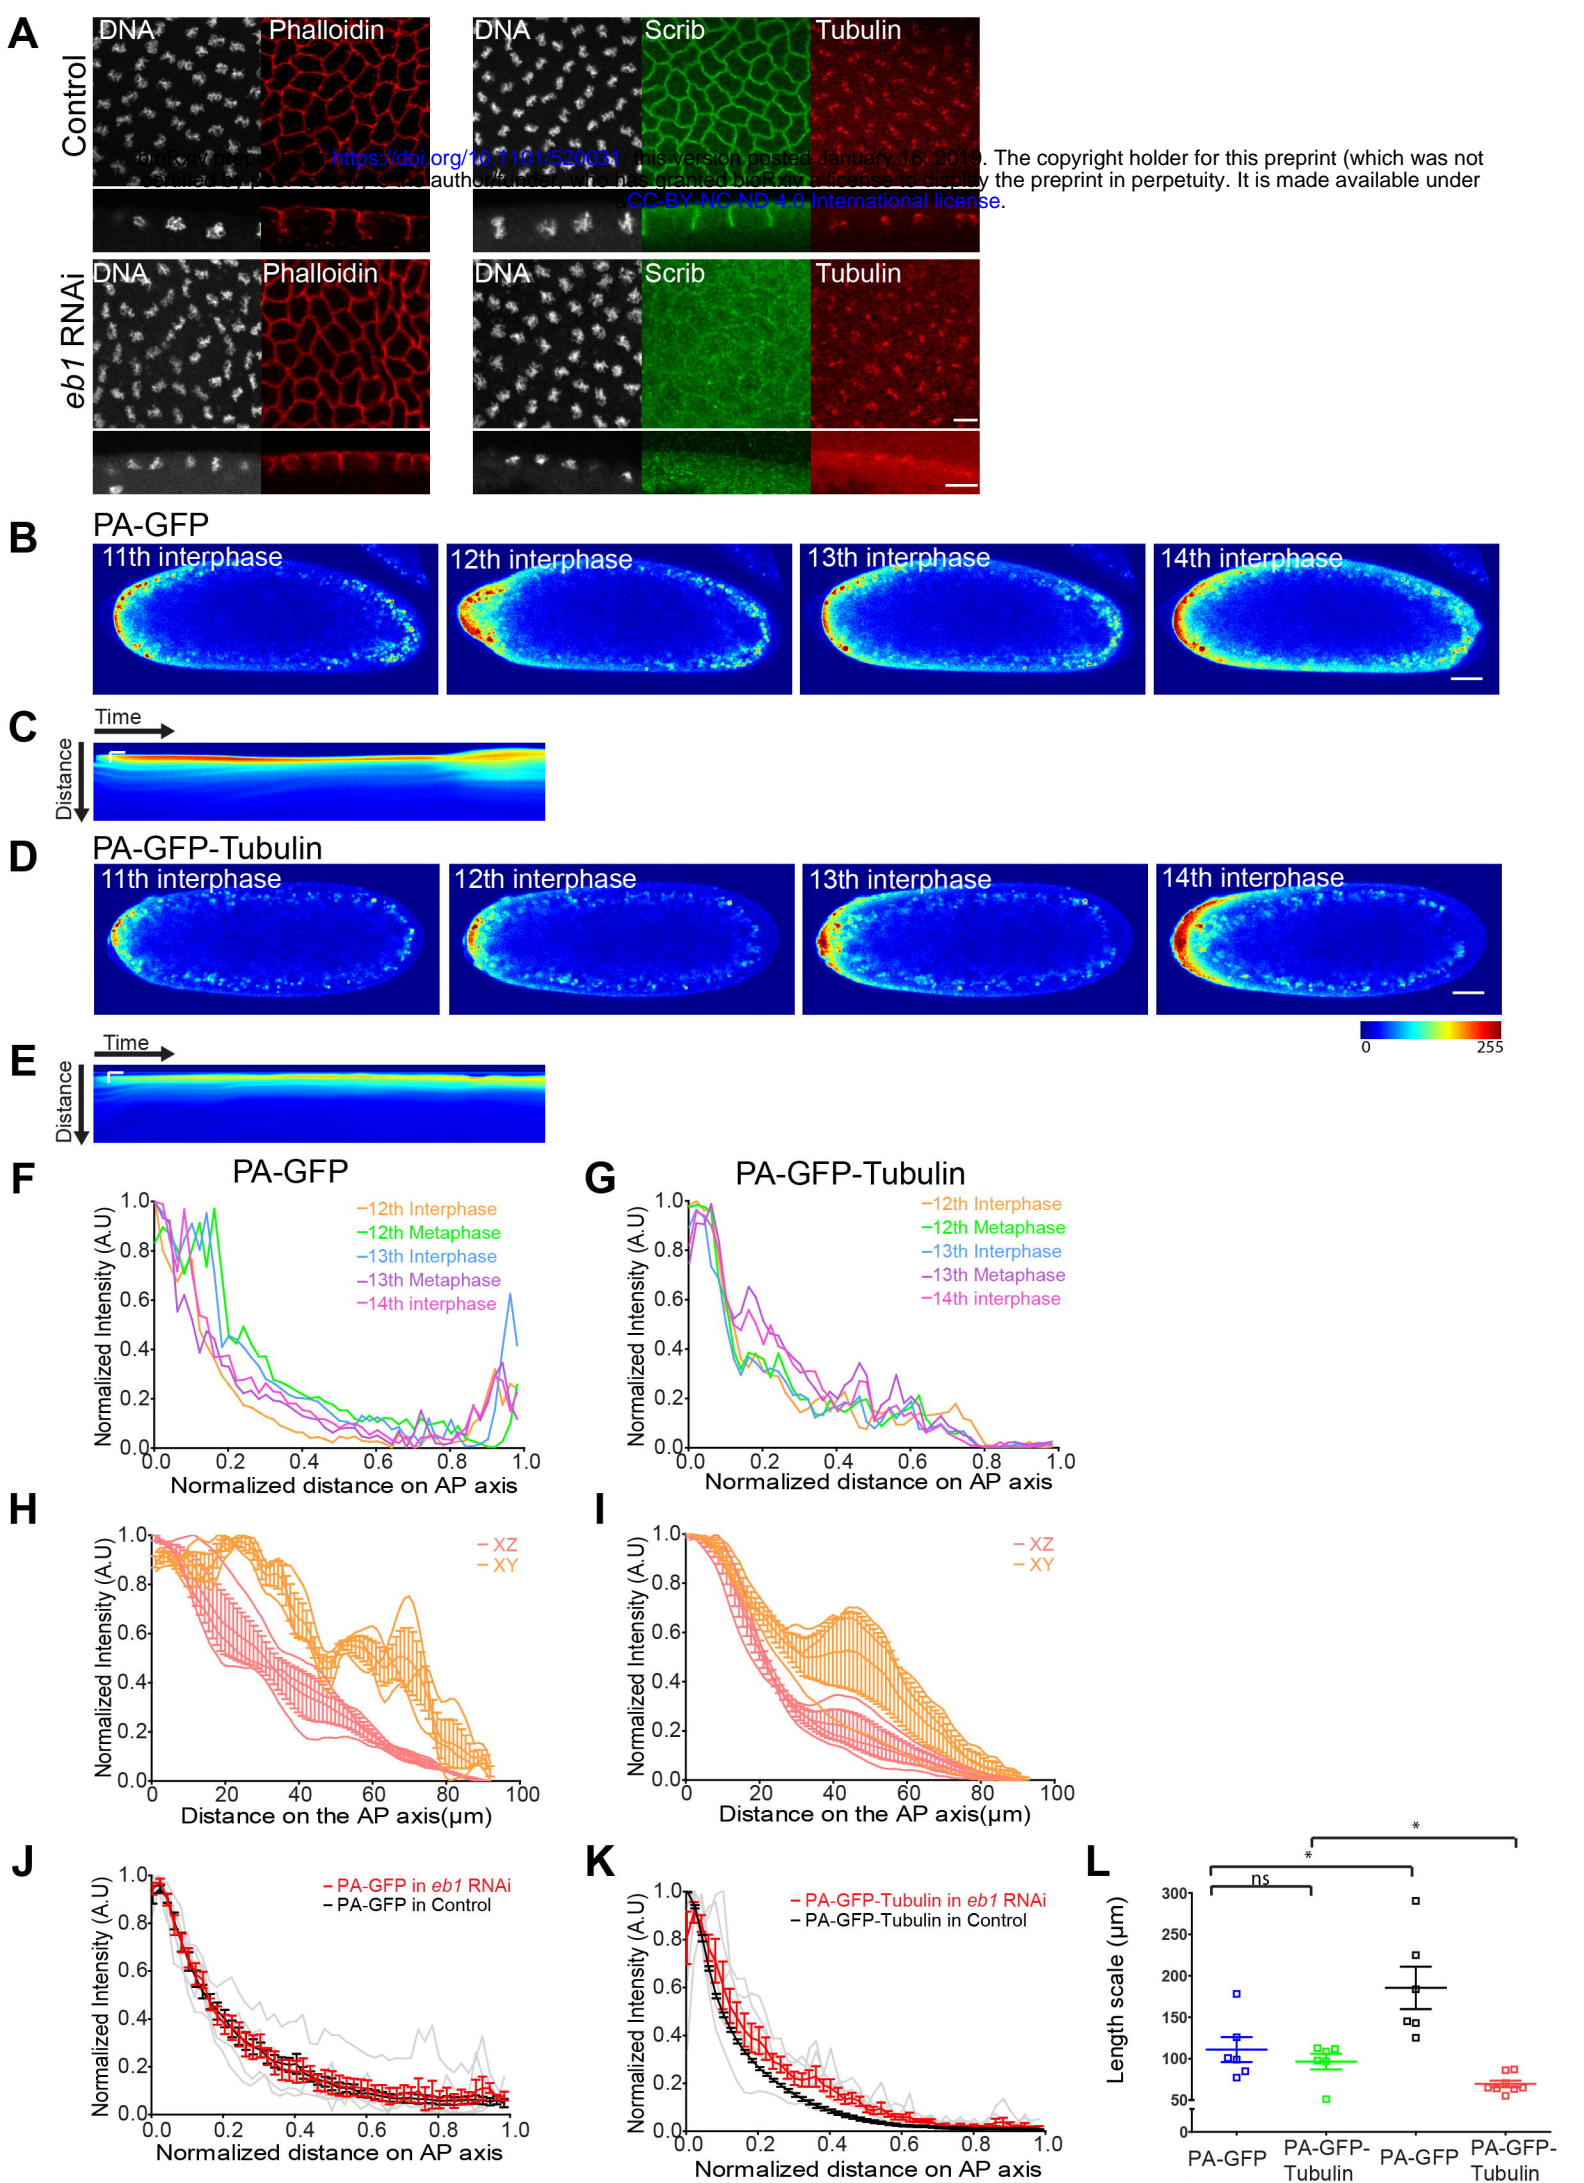

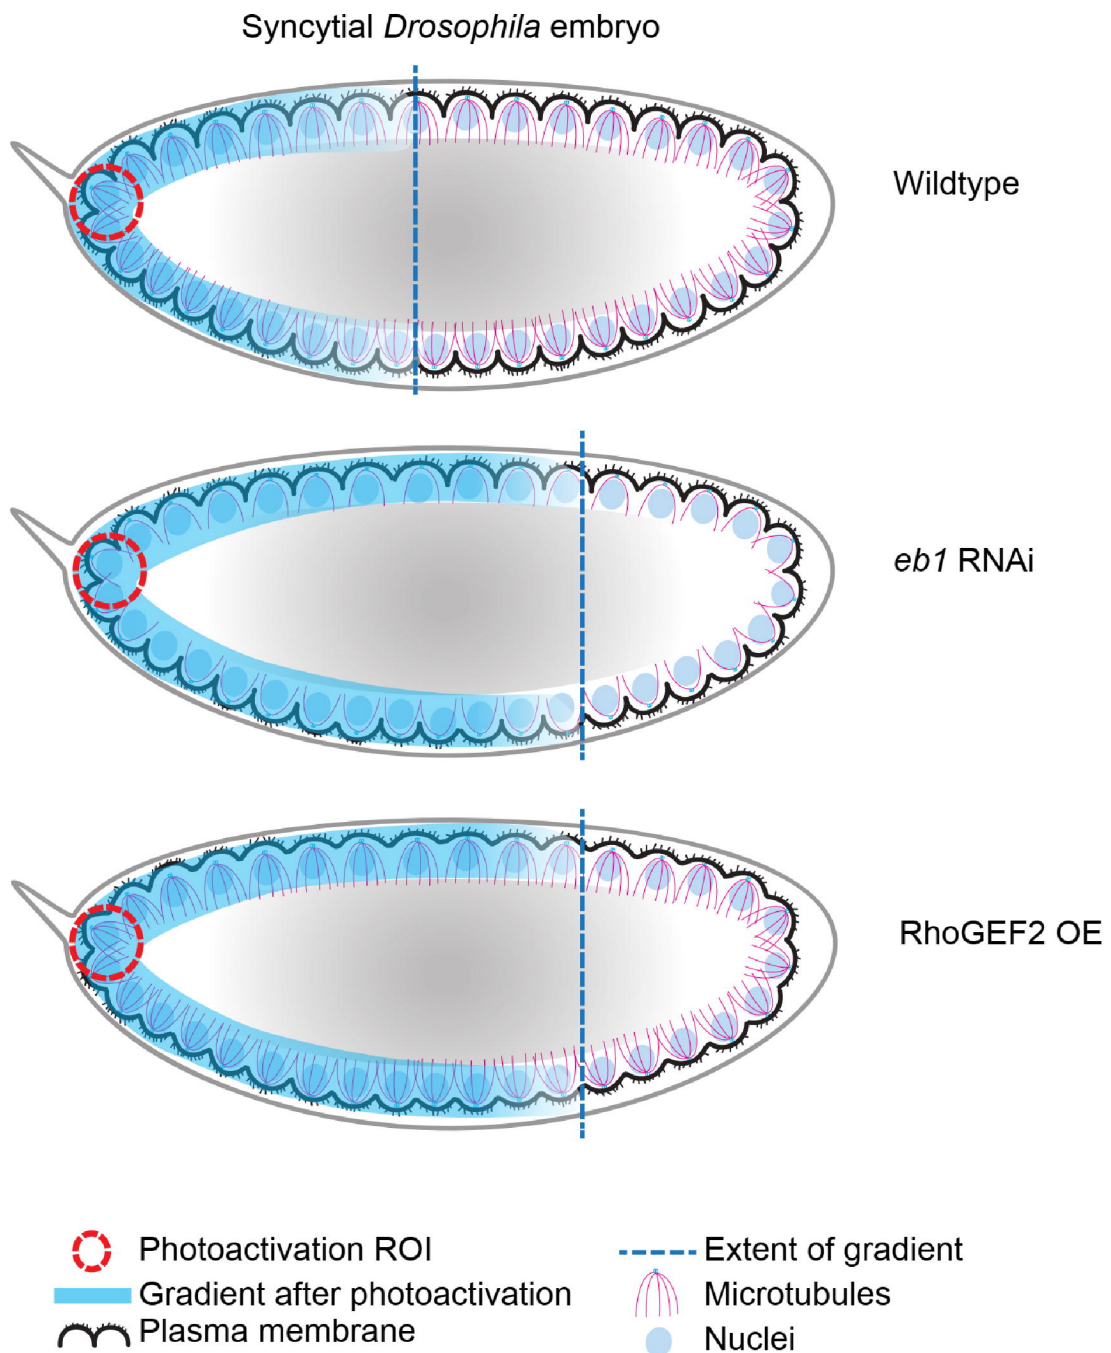

Source: https://www.biorxiv.org/content/10.1101/520031v1.full.pdf
